# Supplementary material for: Small RNAs in metastatic and non-metastatic oral squamous cell carcinoma
Source: PubMed Central journal article supplement (PMC4479233; doi:10.1186/s12920-015-0102-4), 2015-06-24
Supplement: 12920_2015_102_MOESM3_ESM.pdf [file 12920_2015_102_MOESM3_ESM.pdf]

| p0012    |       | p0280    |       | p374     |       | p397     |       | p0441    |       | p0652    |       | p0677    |       | p1231    |       | p1381     |       | p1642    |       |
|----------|-------|----------|-------|----------|-------|----------|-------|----------|-------|----------|-------|----------|-------|----------|-------|-----------|-------|----------|-------|
| miR      | Count | miR      | Count | miR      | Count | miR      | Count | miR      | Count | miR      | Count | miR      | Count | miR      | Count | miR       | Count | miR      | Count |
| let-7a   | 2138  | let-7a   | 917   | let-7a   | 327   | let-7a   | 7815  | let-7a   | 1839  | let-7a   | 8301  | let-7a   | 1281  | let-7a   | 794   | let-7a    | 160   | let-7a   | 886   |
| let-7b   | 3447  | let-7b   | 1881  | let-7b   | 437   | let-7b   | 2669  | let-7b   | 4386  | let-7b   | 6239  | let-7b   | 3744  | let-7b   | 1292  | let-7b    | 597   | let-7b   | 2348  |
| let-7c   | 506   | let-7c   | 261   | let-7c   | 55    | let-7c   | 2804  | let-7c   | 272   | let-7c   | 303   | let-7c   | 872   | let-7c   | 195   | let-7c    | 39    | let-7c   | 136   |
| let-7d   | 672   | let-7d   | 539   | let-7d   | 118   | let-7d   | 3980  | let-7d   | 573   | let-7d   | 3178  | let-7d   | 1161  | let-7d   | 403   | let-7d    | 69    | let-7d   | 873   |
| let-7e   | 300   | let-7e   | 426   | let-7e   | 53    | let-7e   | 733   | let-7e   | 266   | let-7e   | 312   | let-7e   | 475   | let-7e   | 135   | let-7e    | 16    | let-7e   | 78    |
| let-7f   | 1131  | let-7f   | 439   | let-7f   | 161   | let-7f   | 8751  | let-7f   | 1075  | let-7f   | 3511  | let-7f   | 573   | let-7f   | 633   | let-7f    | 84    | let-7f   | 1490  |
| let-7g   | 3783  | let-7g   | 1210  | let-7g   | 490   | let-7g   | 25229 | let-7g   | 2936  | let-7g   | 9598  | let-7g   | 3241  | let-7g   | 1764  | let-7g    | 224   | let-7g   | 2237  |
| let-7i   | 718   | let-7i   | 244   | let-7i   | 170   | let-7i   | 14198 | let-7i   | 1365  | let-7i   | 1529  | let-7i   | 807   | let-7i   | 364   | let-7i    | 340   | let-7i   | 710   |
| mir-1    | 36    | mir-1    | 3     | mir-1    | 44    | mir-1    | 4     | mir-1    | 332   | mir-1    | 7     | mir-1    | 280   | mir-1    | 16    | mir-1     | 52    | mir-1    | 53    |
| mir-100  | 1004  | mir-100  | 780   | mir-100  | 347   | mir-100  | 4863  | mir-100  | 932   | mir-100  | 1833  | mir-100  | 2259  | mir-100  | 1452  | mir-100   | 261   | mir-100  | 786   |
| mir-101  | 54    | mir-101  | 4     | mir-103a | 631   | mir-101  | 180   | mir-101  | 19    | mir-101  | 26    | mir-101  | 74    | mir-101  | 97    | mir-101   | 28    | mir-101  | 46    |
| mir-103a | 3235  | mir-103a | 3457  | mir-106a | 1     | mir-103a | 62416 | mir-103a | 5911  | mir-103a | 13591 | mir-103a | 6554  | mir-103a | 2532  | mir-103a  | 360   | mir-103a | 5306  |
| mir-106a | 22    | mir-106a | 38    | mir-106b | 32    | mir-106a | 26    | mir-106a | 24    | mir-105  | 4     | mir-106a | 17    | mir-106a | 6     | mir-103b  | 1     | mir-106a | 4     |
| mir-106b | 280   | mir-106b | 247   | mir-107  | 220   | mir-106b | 4604  | mir-106b | 349   | mir-106a | 28    | mir-106b | 215   | mir-106b | 170   | mir-106b  | 13    | mir-106b | 270   |
| mir-107  | 931   | mir-107  | 637   | mir-10a  | 20    | mir-107  | 12430 | mir-107  | 731   | mir-106b | 565   | mir-107  | 923   | mir-107  | 374   | mir-107   | 156   | mir-107  | 1173  |
| mir-10a  | 87    | mir-10a  | 64    | mir-10b  | 68    | mir-10a  | 679   | mir-10a  | 272   | mir-107  | 2015  | mir-10a  | 66    | mir-10a  | 67    | mir-10a   | 16    | mir-10a  | 183   |
| mir-10b  | 551   | mir-10b  | 66    | mir-1225 | 2     | mir-10b  | 953   | mir-10b  | 266   | mir-10a  | 67    | mir-10b  | 494   | mir-10b  | 283   | mir-10b   | 135   | mir-10b  | 1048  |
| mir-1207 | 1     | mir-1180 | 21    | mir-1228 | 3     | mir-1180 | 60    | mir-1180 | 4     | mir-10b  | 1196  | mir-1178 | 1     | mir-1182 | 1     | mir-1247  | 2     | mir-1179 | 2     |
| mir-122  | 4     | mir-122  | 6     | mir-1247 | 3     | mir-1185 | 40    | mir-1182 | 1     | mir-1180 | 12    | mir-1180 | 4     | mir-1197 | 2     | mir-1250  | 1     | mir-1180 | 6     |
| mir-1227 | 8     | mir-1226 | 6     | mir-1250 | 1     | mir-1197 | 2     | mir-1185 | 6     | mir-1185 | 4     | mir-1182 | 1     | mir-122  | 2     | mir-125a  | 212   | mir-1199 | 2     |
| mir-1237 | 1     | mir-1247 | 4     | mir-125a | 372   | mir-122  | 4     | mir-1225 | 2     | mir-122  | 2     | mir-1185 | 33    | mir-1225 | 2     | mir-125b  | 193   | mir-1203 | 1     |
| mir-1238 | 2     | mir-1250 | 1     | mir-125b | 145   | mir-1224 | 2     | mir-1226 | 32    | mir-1224 | 6     | mir-122  | 6     | mir-1247 | 8     | mir-126   | 1039  | mir-1224 | 5     |
| mir-1247 | 22    | mir-125a | 3060  | mir-126  | 1707  | mir-1225 | 2     | mir-1228 | 3     | mir-1226 | 4     | mir-1226 | 8     | mir-125a | 860   | mir-1260b | 6     | mir-1226 | 10    |

|           |       |           |      |           |     |           |       |           |      |           |       |           |      |           |      |          |      |           |      |
|-----------|-------|-----------|------|-----------|-----|-----------|-------|-----------|------|-----------|-------|-----------|------|-----------|------|----------|------|-----------|------|
| mir-1250  | 2     | mir-125b  | 1258 | mir-1260b | 30  | mir-1226  | 13    | mir-1234  | 2    | mir-1227  | 10    | mir-1228  | 1    | mir-125b  | 480  | mir-127  | 3    | mir-1227  | 2    |
| mir-1252  | 4     | mir-126   | 822  | mir-127   | 1   | mir-1227  | 20    | mir-1236  | 1    | mir-1228  | 1     | mir-1233  | 2    | mir-126   | 5402 | mir-1271 | 4    | mir-1228  | 1    |
| mir-125a  | 1600  | mir-1260b | 129  | mir-1271  | 2   | mir-1228  | 23    | mir-1238  | 2    | mir-1229  | 1     | mir-1236  | 2    | mir-1260b | 30   | mir-1277 | 62   | mir-1229  | 2    |
| mir-125b  | 1307  | mir-127   | 2    | mir-1273h | 2   | mir-1237  | 9     | mir-1247  | 14   | mir-1250  | 5     | mir-1237  | 4    | mir-127   | 1    | mir-128  | 10   | mir-1236  | 5    |
| mir-126   | 11592 | mir-1271  | 8    | mir-1277  | 12  | mir-1247  | 13    | mir-1250  | 1    | mir-1252  | 2     | mir-1238  | 2    | mir-1271  | 4    | mir-1285 | 2    | mir-1237  | 1    |
| mir-1260b | 74    | mir-1277  | 34   | mir-128   | 18  | mir-1255a | 4     | mir-1255b | 2    | mir-125a  | 2210  | mir-1245a | 2    | mir-1273d | 1    | mir-129  | 4    | mir-1238  | 2    |
| mir-127   | 4     | mir-128   | 39   | mir-129   | 4   | mir-1256  | 16    | mir-125a  | 2552 | mir-125b  | 957   | mir-1247  | 59   | mir-1277  | 8    | mir-1301 | 2    | mir-1247  | 7    |
| mir-1271  | 10    | mir-1287  | 1    | mir-1296  | 2   | mir-125a  | 13759 | mir-125b  | 778  | mir-126   | 21824 | mir-1252  | 2    | mir-1278  | 1    | mir-1307 | 12   | mir-1255a | 2    |
| mir-1277  | 9     | mir-129   | 4    | mir-1307  | 7   | mir-125b  | 15548 | mir-126   | 6052 | mir-1260b | 210   | mir-1255a | 2    | mir-128   | 8    | mir-130a | 267  | mir-1255b | 6    |
| mir-128   | 47    | mir-1292  | 4    | mir-130a  | 418 | mir-126   | 36458 | mir-1260b | 77   | mir-1269b | 2     | mir-1256  | 4    | mir-129   | 2    | mir-130b | 1430 | mir-1256  | 2    |
| mir-1285  | 4     | mir-1296  | 4    | mir-130b  | 145 | mir-1260b | 1798  | mir-1262  | 2    | mir-127   | 32    | mir-125a  | 4092 | mir-1296  | 2    | mir-132  | 18   | mir-125a  | 1278 |
| mir-129   | 3     | mir-1301  | 10   | mir-132   | 28  | mir-1262  | 2     | mir-127   | 14   | mir-1271  | 24    | mir-125b  | 2814 | mir-1301  | 13   | mir-134  | 4    | mir-125b  | 338  |
| mir-1292  | 4     | mir-1304  | 1    | mir-1323  | 2   | mir-1268a | 5     | mir-1271  | 12   | mir-1277  | 19    | mir-126   | 8443 | mir-1306  | 2    | mir-135b | 24   | mir-126   | 4608 |
| mir-1296  | 6     | mir-1306  | 16   | mir-133a  | 10  | mir-127   | 50    | mir-1277  | 28   | mir-128   | 87    | mir-1260b | 75   | mir-1307  | 34   | mir-136  | 27   | mir-1260b | 65   |
| mir-1301  | 7     | mir-1307  | 26   | mir-133b  | 4   | mir-1271  | 98    | mir-1278  | 2    | mir-1285  | 6     | mir-127   | 169  | mir-130a  | 1037 | mir-138  | 5    | mir-1268a | 2    |
| mir-1304  | 2     | mir-130a  | 840  | mir-134   | 6   | mir-1273d | 2     | mir-128   | 61   | mir-1287  | 6     | mir-1271  | 8    | mir-130b  | 170  | mir-139  | 22   | mir-127   | 18   |
| mir-1306  | 10    | mir-130b  | 1160 | mir-1343  | 1   | mir-1273g | 17    | mir-1285  | 4    | mir-129   | 3     | mir-1273g | 2    | mir-132   | 32   | mir-140  | 80   | mir-1271  | 7    |
| mir-1307  | 9     | mir-132   | 38   | mir-135a  | 2   | mir-1273h | 1     | mir-1287  | 2    | mir-1292  | 3     | mir-1273h | 2    | mir-133a  | 2    | mir-141  | 22   | mir-1273d | 1    |
| mir-130a  | 1181  | mir-133a  | 2    | mir-135b  | 13  | mir-1277  | 46    | mir-129   | 1    | mir-1295a | 2     | mir-1277  | 19   | mir-134   | 2    | mir-142  | 169  | mir-1273g | 14   |
| mir-130b  | 1146  | mir-134   | 18   | mir-136   | 13  | mir-1278  | 2     | mir-1292  | 8    | mir-1296  | 8     | mir-128   | 72   | mir-135a  | 11   | mir-143  | 223  | mir-1273h | 4    |
| mir-132   | 36    | mir-135a  | 2    | mir-139   | 22  | mir-128   | 241   | mir-1295a | 2    | mir-1301  | 10    | mir-1285  | 3    | mir-135b  | 207  | mir-144  | 39   | mir-1277  | 9    |
| mir-      | 2     | mir-      | 359  | mir-140   | 118 | mir-      | 38    | mir-      | 2    | mir-      | 26    | mir-129   | 6    | mir-      | 58   | mir-     | 383  | mir-      | 104  |

|          |      |          |      |          |     |           |       |          |      |          |      |          |      |          |      |          |      |          |      |
|----------|------|----------|------|----------|-----|-----------|-------|----------|------|----------|------|----------|------|----------|------|----------|------|----------|------|
| 133a     |      | 135b     |      |          |     | 1285      |       | 1296     |      | 1306     |      |          |      | 136      |      | 145      |      | 128      |      |
| mir-134  | 10   | mir-136  | 8    | mir-141  | 31  | mir-1287  | 14    | mir-1301 | 25   | mir-1307 | 47   | mir-1296 | 12   | mir-138  | 39   | mir-146a | 135  | mir-1285 | 32   |
| mir-1343 | 1    | mir-138  | 7    | mir-142  | 142 | mir-1288  | 1     | mir-1304 | 8    | mir-130a | 5642 | mir-1301 | 27   | mir-139  | 14   | mir-146b | 20   | mir-1287 | 2    |
| mir-135a | 6    | mir-139  | 29   | mir-143  | 152 | mir-129   | 9     | mir-1306 | 17   | mir-130b | 917  | mir-1304 | 1    | mir-140  | 203  | mir-147b | 1    | mir-1288 | 1    |
| mir-135b | 200  | mir-140  | 171  | mir-144  | 26  | mir-1292  | 8     | mir-1307 | 28   | mir-132  | 87   | mir-1306 | 19   | mir-141  | 331  | mir-148a | 1645 | mir-129  | 2    |
| mir-136  | 46   | mir-141  | 163  | mir-145  | 431 | mir-1295a | 19    | mir-130a | 2875 | mir-1323 | 4    | mir-1307 | 140  | mir-142  | 984  | mir-148b | 18   | mir-1290 | 6    |
| mir-138  | 38   | mir-142  | 89   | mir-146a | 10  | mir-1296  | 19    | mir-130b | 1538 | mir-133a | 2    | mir-130a | 1532 | mir-143  | 674  | mir-149  | 8    | mir-1292 | 3    |
| mir-139  | 147  | mir-143  | 180  | mir-146b | 20  | mir-1301  | 69    | mir-132  | 162  | mir-134  | 4    | mir-130b | 765  | mir-144  | 31   | mir-150  | 148  | mir-1296 | 9    |
| mir-140  | 730  | mir-144  | 18   | mir-147b | 2   | mir-1304  | 13    | mir-1323 | 2    | mir-135b | 846  | mir-132  | 137  | mir-145  | 886  | mir-151a | 45   | mir-1301 | 7    |
| mir-141  | 159  | mir-145  | 2282 | mir-148a | 109 | mir-1306  | 133   | mir-133a | 40   | mir-136  | 16   | mir-133a | 190  | mir-146a | 356  | mir-151b | 2    | mir-1304 | 4    |
| mir-142  | 1165 | mir-146a | 14   | mir-148b | 12  | mir-1307  | 300   | mir-133b | 15   | mir-137  | 1    | mir-133b | 120  | mir-146b | 89   | mir-152  | 27   | mir-1306 | 4    |
| mir-143  | 1357 | mir-146b | 32   | mir-149  | 70  | mir-130a  | 31126 | mir-134  | 35   | mir-138  | 179  | mir-134  | 51   | mir-147b | 8    | mir-1537 | 5    | mir-1307 | 37   |
| mir-144  | 362  | mir-147b | 2    | mir-150  | 410 | mir-130b  | 7419  | mir-1343 | 2    | mir-139  | 155  | mir-1343 | 6    | mir-148a | 1657 | mir-154  | 18   | mir-130a | 2863 |
| mir-145  | 3505 | mir-148a | 212  | mir-151a | 47  | mir-132   | 254   | mir-135b | 186  | mir-140  | 675  | mir-135a | 5    | mir-148b | 100  | mir-155  | 61   | mir-130b | 1018 |
| mir-146a | 174  | mir-148b | 22   | mir-151b | 4   | mir-1323  | 8     | mir-136  | 18   | mir-141  | 569  | mir-135b | 60   | mir-149  | 84   | mir-15a  | 180  | mir-132  | 16   |
| mir-146b | 120  | mir-149  | 445  | mir-152  | 23  | mir-133a  | 2     | mir-138  | 51   | mir-142  | 883  | mir-136  | 201  | mir-150  | 460  | mir-15b  | 106  | mir-1323 | 2    |
| mir-148a | 2909 | mir-150  | 310  | mir-154  | 6   | mir-134   | 14    | mir-139  | 40   | mir-143  | 1185 | mir-138  | 25   | mir-151a | 151  | mir-16   | 388  | mir-133b | 4    |
| mir-148b | 138  | mir-151a | 253  | mir-155  | 10  | mir-1343  | 13    | mir-140  | 504  | mir-144  | 68   | mir-139  | 323  | mir-151b | 3    | mir-17   | 366  | mir-134  | 6    |
| mir-149  | 151  | mir-151b | 10   | mir-15a  | 65  | mir-135a  | 19    | mir-141  | 469  | mir-145  | 5110 | mir-140  | 1592 | mir-152  | 128  | mir-181a | 96   | mir-1343 | 3    |
| mir-150  | 2009 | mir-152  | 63   | mir-15b  | 100 | mir-135b  | 13887 | mir-142  | 823  | mir-146a | 189  | mir-141  | 47   | mir-153  | 5    | mir-181b | 100  | mir-135a | 2    |
| mir-151a | 387  | mir-154  | 10   | mir-16   | 348 | mir-136   | 159   | mir-143  | 955  | mir-146b | 221  | mir-142  | 1014 | mir-1537 | 5    | mir-181c | 23   | mir-135b | 422  |
| mir-151b | 8    | mir-155  | 16   | mir-17   | 309 | mir-138   | 580   | mir-144  | 268  | mir-147b | 16   | mir-143  | 2246 | mir-154  | 8    | mir-181d | 36   | mir-136  | 42   |

|          |      |          |      |          |     |          |       |          |      |          |       |          |      |          |      |          |      |          |      |
|----------|------|----------|------|----------|-----|----------|-------|----------|------|----------|-------|----------|------|----------|------|----------|------|----------|------|
| mir-152  | 210  | mir-15a  | 80   | mir-181a | 120 | mir-139  | 62    | mir-145  | 3039 | mir-148a | 1952  | mir-144  | 326  | mir-155  | 61   | mir-182  | 24   | mir-137  | 2    |
| mir-154  | 18   | mir-15b  | 1277 | mir-181b | 106 | mir-140  | 3001  | mir-146a | 488  | mir-148b | 118   | mir-145  | 8085 | mir-15a  | 357  | mir-183  | 6    | mir-138  | 32   |
| mir-155  | 137  | mir-16   | 1500 | mir-181c | 9   | mir-141  | 2672  | mir-146b | 158  | mir-149  | 537   | mir-146a | 138  | mir-15b  | 481  | mir-185  | 52   | mir-139  | 15   |
| mir-15a  | 465  | mir-17   | 420  | mir-181d | 14  | mir-142  | 4818  | mir-147b | 2    | mir-150  | 1265  | mir-146b | 558  | mir-16   | 2535 | mir-186  | 54   | mir-140  | 323  |
| mir-15b  | 1284 | mir-181a | 508  | mir-182  | 17  | mir-143  | 3494  | mir-148a | 626  | mir-151a | 798   | mir-147b | 1    | mir-17   | 748  | mir-187  | 7    | mir-141  | 1245 |
| mir-16   | 3046 | mir-181b | 102  | mir-1827 | 2   | mir-144  | 646   | mir-148b | 89   | mir-151b | 11    | mir-148a | 1384 | mir-181a | 122  | mir-188  | 8    | mir-142  | 378  |
| mir-17   | 1435 | mir-181c | 31   | mir-183  | 9   | mir-145  | 10190 | mir-149  | 255  | mir-152  | 499   | mir-148b | 87   | mir-181b | 24   | mir-18a  | 6    | mir-143  | 585  |
| mir-181a | 506  | mir-181d | 37   | mir-185  | 8   | mir-1468 | 11    | mir-150  | 1538 | mir-1537 | 3     | mir-149  | 54   | mir-181c | 94   | mir-18b  | 1    | mir-144  | 86   |
| mir-181b | 52   | mir-182  | 582  | mir-186  | 17  | mir-1469 | 2     | mir-151a | 377  | mir-154  | 16    | mir-150  | 1390 | mir-181d | 17   | mir-190a | 1    | mir-145  | 1894 |
| mir-181c | 56   | mir-183  | 167  | mir-187  | 8   | mir-146a | 936   | mir-151b | 2    | mir-155  | 73    | mir-151a | 360  | mir-182  | 169  | mir-191  | 188  | mir-1468 | 2    |
| mir-181d | 7    | mir-184  | 2    | mir-188  | 10  | mir-146b | 603   | mir-152  | 223  | mir-15a  | 844   | mir-151b | 1    | mir-183  | 57   | mir-192  | 15   | mir-146a | 107  |
| mir-182  | 265  | mir-185  | 120  | mir-18a  | 18  | mir-147b | 68    | mir-153  | 2    | mir-15b  | 2508  | mir-152  | 360  | mir-185  | 171  | mir-193a | 3    | mir-146b | 60   |
| mir-183  | 79   | mir-186  | 52   | mir-18b  | 6   | mir-148a | 8586  | mir-154  | 37   | mir-16   | 10919 | mir-153  | 2    | mir-186  | 168  | mir-193b | 238  | mir-147b | 4    |
| mir-185  | 445  | mir-187  | 39   | mir-1908 | 2   | mir-148b | 751   | mir-155  | 95   | mir-17   | 7775  | mir-1537 | 6    | mir-187  | 22   | mir-194  | 3    | mir-148a | 2902 |
| mir-186  | 297  | mir-188  | 2    | mir-1909 | 2   | mir-149  | 8104  | mir-15a  | 413  | mir-181a | 660   | mir-154  | 66   | mir-188  | 16   | mir-195  | 34   | mir-148b | 245  |
| mir-187  | 22   | mir-18a  | 44   | mir-190a | 2   | mir-150  | 4276  | mir-15b  | 1202 | mir-181b | 44    | mir-155  | 89   | mir-18a  | 106  | mir-197  | 15   | mir-149  | 464  |
| mir-188  | 31   | mir-18b  | 9    | mir-191  | 304 | mir-151a | 2018  | mir-16   | 4028 | mir-181c | 87    | mir-15a  | 515  | mir-18b  | 2    | mir-199a | 410  | mir-150  | 131  |
| mir-18a  | 109  | mir-190a | 2    | mir-192  | 15  | mir-151b | 34    | mir-17   | 1877 | mir-181d | 2     | mir-15b  | 794  | mir-190a | 2    | mir-199b | 1366 | mir-151a | 346  |
| mir-18b  | 14   | mir-191  | 992  | mir-193b | 56  | mir-152  | 315   | mir-181a | 1012 | mir-182  | 1480  | mir-16   | 6025 | mir-191  | 761  | mir-19a  | 172  | mir-151b | 4    |
| mir-1909 | 18   | mir-192  | 53   | mir-195  | 59  | mir-153  | 1     | mir-181b | 113  | mir-183  | 291   | mir-17   | 1002 | mir-192  | 53   | mir-19b  | 170  | mir-152  | 374  |
| mir-190a | 33   | mir-193a | 60   | mir-197  | 15  | mir-1537 | 5     | mir-181c | 90   | mir-184  | 4     | mir-181a | 841  | mir-193a | 64   | mir-200a | 65   | mir-1537 | 1    |
| mir-     | 1320 | mir-     | 774  | mir-     | 218 | mir-154  | 62    | mir-     | 64   | mir-185  | 1175  | mir-     | 71   | mir-     | 178  | mir-     | 51   | mir-     | 3    |

|          |       |          |       |          |      |          |       |          |      |          |      |          |      |          |       |          |      |          |      |
|----------|-------|----------|-------|----------|------|----------|-------|----------|------|----------|------|----------|------|----------|-------|----------|------|----------|------|
| 191      |       | 193b     |       | 199a     |      |          |       | 181d     |      |          |      | 181b     |      | 193b     |       | 200b     |      | 154      |      |
| mir-1911 | 1     | mir-194  | 4     | mir-199b | 854  | mir-155  | 218   | mir-182  | 221  | mir-186  | 321  | mir-181c | 67   | mir-194  | 4     | mir-200c | 51   | mir-155  | 22   |
| mir-1913 | 2     | mir-195  | 64    | mir-19a  | 10   | mir-15a  | 2312  | mir-183  | 67   | mir-187  | 107  | mir-181d | 27   | mir-195  | 204   | mir-203a | 711  | mir-15a  | 473  |
| mir-1914 | 1     | mir-196a | 8     | mir-19b  | 56   | mir-15b  | 8329  | mir-185  | 452  | mir-188  | 43   | mir-182  | 32   | mir-196a | 4     | mir-204  | 10   | mir-15b  | 1396 |
| mir-192  | 140   | mir-196b | 7     | mir-200a | 71   | mir-16   | 77031 | mir-186  | 227  | mir-18a  | 752  | mir-1827 | 2    | mir-196b | 4     | mir-205  | 3170 | mir-16   | 6707 |
| mir-193a | 79    | mir-197  | 139   | mir-200b | 68   | mir-17   | 7258  | mir-187  | 16   | mir-18b  | 12   | mir-183  | 13   | mir-197  | 61    | mir-206  | 57   | mir-17   | 1189 |
| mir-193b | 474   | mir-1976 | 2     | mir-200c | 38   | mir-181a | 1247  | mir-188  | 16   | mir-190a | 10   | mir-185  | 1057 | mir-199a | 1627  | mir-20a  | 76   | mir-181a | 250  |
| mir-194  | 4     | mir-199a | 458   | mir-203a | 433  | mir-181b | 168   | mir-18a  | 227  | mir-191  | 2939 | mir-186  | 393  | mir-199b | 4067  | mir-20b  | 4    | mir-181b | 50   |
| mir-195  | 317   | mir-199b | 2009  | mir-204  | 7    | mir-181c | 908   | mir-18b  | 14   | mir-1910 | 8    | mir-187  | 12   | mir-19a  | 593   | mir-21   | 7734 | mir-181c | 86   |
| mir-196a | 18    | mir-19a  | 68    | mir-205  | 2524 | mir-181d | 84    | mir-1909 | 8    | mir-192  | 231  | mir-188  | 39   | mir-19b  | 955   | mir-210  | 89   | mir-181d | 10   |
| mir-196b | 2     | mir-19b  | 172   | mir-206  | 75   | mir-182  | 5432  | mir-190a | 13   | mir-193a | 183  | mir-18a  | 172  | mir-200a | 725   | mir-212  | 2    | mir-182  | 365  |
| mir-197  | 98    | mir-200a | 377   | mir-20a  | 76   | mir-1827 | 2     | mir-191  | 1432 | mir-193b | 780  | mir-18b  | 9    | mir-200b | 358   | mir-214  | 169  | mir-183  | 160  |
| mir-199a | 1851  | mir-200b | 392   | mir-20b  | 4    | mir-183  | 1006  | mir-1910 | 4    | mir-195  | 757  | mir-1908 | 2    | mir-200c | 194   | mir-218  | 2    | mir-184  | 4    |
| mir-199b | 7667  | mir-200c | 1400  | mir-21   | 2690 | mir-184  | 184   | mir-192  | 86   | mir-196a | 8    | mir-190a | 2    | mir-203a | 4150  | mir-22   | 189  | mir-185  | 219  |
| mir-19a  | 805   | mir-203a | 2232  | mir-210  | 27   | mir-185  | 1711  | mir-193a | 58   | mir-196b | 83   | mir-190b | 1    | mir-203b | 3     | mir-221  | 490  | mir-186  | 123  |
| mir-19b  | 1211  | mir-203b | 2     | mir-2110 | 4    | mir-186  | 1380  | mir-193b | 1163 | mir-197  | 231  | mir-191  | 2798 | mir-204  | 8     | mir-222  | 45   | mir-187  | 98   |
| mir-200a | 433   | mir-204  | 345   | mir-214  | 227  | mir-187  | 161   | mir-194  | 4    | mir-199a | 2580 | mir-1911 | 1    | mir-205  | 18853 | mir-223  | 231  | mir-188  | 10   |
| mir-200b | 398   | mir-205  | 21857 | mir-215  | 2    | mir-188  | 199   | mir-195  | 205  | mir-199b | 5980 | mir-192  | 58   | mir-206  | 12    | mir-224  | 42   | mir-18a  | 103  |
| mir-200c | 347   | mir-20a  | 128   | mir-218  | 8    | mir-18a  | 791   | mir-196a | 62   | mir-19a  | 1693 | mir-193a | 229  | mir-20a  | 347   | mir-2355 | 2    | mir-18b  | 15   |
| mir-202  | 5     | mir-20b  | 124   | mir-22   | 88   | mir-18b  | 15    | mir-196b | 14   | mir-19b  | 3511 | mir-193b | 496  | mir-20b  | 8     | mir-23a  | 1139 | mir-1908 | 4    |
| mir-203a | 12687 | mir-21   | 6002  | mir-221  | 114  | mir-1908 | 7     | mir-197  | 123  | mir-200a | 1808 | mir-194  | 2    | mir-21   | 15270 | mir-23b  | 267  | mir-1909 | 10   |
| mir-203b | 13    | mir-210  | 235   | mir-222  | 17   | mir-1909 | 2     | mir-1976 | 2    | mir-200b | 1392 | mir-195  | 470  | mir-210  | 228   | mir-23c  | 943  | mir-190a | 21   |

|          |       |          |      |          |     |          |       |          |       |          |       |          |       |          |      |           |      |          |      |
|----------|-------|----------|------|----------|-----|----------|-------|----------|-------|----------|-------|----------|-------|----------|------|-----------|------|----------|------|
| mir-204  | 42    | mir-2110 | 2    | mir-223  | 383 | mir-190a | 24    | mir-199a | 1956  | mir-200c | 512   | mir-196a | 2     | mir-211  | 4    | mir-24    | 384  | mir-190b | 1    |
| mir-205  | 9311  | mir-2116 | 2    | mir-224  | 39  | mir-191  | 27167 | mir-199b | 5569  | mir-203a | 57151 | mir-196b | 4     | mir-2110 | 2    | mir-25    | 72   | mir-191  | 1417 |
| mir-208a | 3     | mir-214  | 720  | mir-2355 | 1   | mir-1910 | 7     | mir-19a  | 715   | mir-203b | 8     | mir-197  | 364   | mir-214  | 365  | mir-26a   | 155  | mir-1910 | 4    |
| mir-20a  | 614   | mir-215  | 2    | mir-23a  | 870 | mir-1914 | 1     | mir-19b  | 1089  | mir-204  | 38    | mir-1976 | 2     | mir-218  | 42   | mir-26b   | 99   | mir-1914 | 3    |
| mir-20b  | 80    | mir-217  | 2    | mir-23b  | 301 | mir-1915 | 1     | mir-200a | 250   | mir-205  | 87204 | mir-199a | 4652  | mir-22   | 477  | mir-27a   | 478  | mir-1915 | 3    |
| mir-21   | 21763 | mir-218  | 26   | mir-23c  | 161 | mir-192  | 14328 | mir-200b | 244   | mir-206  | 4     | mir-199b | 9129  | mir-221  | 867  | mir-27b   | 154  | mir-192  | 150  |
| mir-210  | 181   | mir-22   | 110  | mir-24   | 698 | mir-193a | 676   | mir-200c | 1099  | mir-20a  | 3495  | mir-19a  | 415   | mir-222  | 283  | mir-28    | 36   | mir-193a | 37   |
| mir-2110 | 2     | mir-221  | 1242 | mir-25   | 76  | mir-193b | 4439  | mir-203a | 6685  | mir-20b  | 114   | mir-19b  | 846   | mir-223  | 1585 | mir-299   | 5    | mir-193b | 310  |
| mir-214  | 995   | mir-222  | 192  | mir-26a  | 486 | mir-194  | 40    | mir-204  | 10    | mir-21   | 40306 | mir-200a | 117   | mir-224  | 88   | mir-29a   | 1127 | mir-194  | 24   |
| mir-215  | 1     | mir-223  | 631  | mir-26b  | 108 | mir-195  | 3113  | mir-205  | 30107 | mir-210  | 2150  | mir-200b | 76    | mir-2278 | 2    | mir-29b   | 198  | mir-195  | 112  |
| mir-218  | 56    | mir-224  | 137  | mir-27a  | 385 | mir-196a | 111   | mir-206  | 821   | mir-2110 | 2     | mir-200c | 99    | mir-23a  | 3391 | mir-29c   | 898  | mir-196a | 8    |
| mir-219a | 2     | mir-2277 | 8    | mir-27b  | 148 | mir-196b | 97    | mir-208a | 3     | mir-2116 | 8     | mir-203a | 583   | mir-23b  | 1103 | mir-301a  | 6    | mir-196b | 114  |
| mir-22   | 594   | mir-2278 | 2    | mir-28   | 58  | mir-197  | 1044  | mir-20a  | 931   | mir-214  | 1334  | mir-203b | 2     | mir-23c  | 33   | mir-30a   | 47   | mir-197  | 65   |
| mir-221  | 895   | mir-2355 | 6    | mir-299  | 2   | mir-1976 | 7     | mir-20b  | 112   | mir-215  | 2     | mir-204  | 8     | mir-24   | 3231 | mir-30b   | 82   | mir-1976 | 4    |
| mir-222  | 289   | mir-23a  | 2410 | mir-29a  | 896 | mir-199a | 5598  | mir-21   | 39371 | mir-216a | 1     | mir-205  | 2040  | mir-25   | 314  | mir-30c   | 14   | mir-198  | 4    |
| mir-223  | 3857  | mir-23b  | 2398 | mir-29b  | 98  | mir-199b | 11710 | mir-210  | 1189  | mir-218  | 22    | mir-206  | 1095  | mir-2682 | 1    | mir-30d   | 96   | mir-199a | 1084 |
| mir-224  | 333   | mir-23c  | 232  | mir-29c  | 474 | mir-19a  | 3349  | mir-2110 | 9     | mir-219a | 3     | mir-208b | 4     | mir-26a  | 1540 | mir-30e   | 106  | mir-199b | 2855 |
| mir-2355 | 2     | mir-24   | 3900 | mir-301a | 6   | mir-19b  | 4619  | mir-2116 | 6     | mir-219b | 2     | mir-20a  | 219   | mir-26b  | 572  | mir-31    | 246  | mir-19a  | 1546 |
| mir-23a  | 5272  | mir-25   | 429  | mir-302a | 1   | mir-200a | 6769  | mir-212  | 14    | mir-22   | 1658  | mir-20b  | 35    | mir-27a  | 2038 | mir-3129  | 2    | mir-19b  | 2539 |
| mir-23b  | 2262  | mir-26a  | 1891 | mir-30a  | 44  | mir-200b | 2836  | mir-214  | 1748  | mir-221  | 1443  | mir-21   | 41089 | mir-27b  | 603  | mir-3150b | 1    | mir-200a | 1851 |
| mir-23c  | 129   | mir-26b  | 195  | mir-30b  | 105 | mir-200c | 722   | mir-218  | 20    | mir-222  | 275   | mir-210  | 319   | mir-28   | 76   | mir-3187  | 2    | mir-200b | 612  |
| mir-24   | 5067  | mir-27a  | 531  | mir-30c  | 44  | mir-202  | 2     | mir-     | 2     | mir-223  | 4169  | mir-     | 2     | mir-     | 3770 | mir-      | 1    | mir-     | 636  |

|          |      |           |      |          |     |          |        |          |       |          |       |          |      |           |      |          |     |          |       |
|----------|------|-----------|------|----------|-----|----------|--------|----------|-------|----------|-------|----------|------|-----------|------|----------|-----|----------|-------|
|          |      |           |      |          |     |          |        | 219a     |       |          |       | 2110     |      | 29a       |      | 3194     |     | 200c     |       |
| mir-25   | 456  | mir-27b   | 412  | mir-30d  | 85  | mir-203a | 4013   | mir-22   | 582   | mir-224  | 2080  | mir-2116 | 1    | mir-29b   | 1266 | mir-32   | 4   | mir-202  | 1     |
| mir-26a  | 4162 | mir-28    | 301  | mir-30e  | 39  | mir-203b | 12     | mir-221  | 1505  | mir-2277 | 5     | mir-212  | 8    | mir-29c   | 3692 | mir-320b | 2   | mir-203a | 2140  |
| mir-26b  | 617  | mir-296   | 117  | mir-31   | 167 | mir-204  | 6552   | mir-222  | 274   | mir-2278 | 5     | mir-214  | 5681 | mir-301a  | 106  | mir-323a | 7   | mir-203b | 6     |
| mir-27a  | 2272 | mir-29a   | 2653 | mir-3186 | 2   | mir-205  | 125620 | mir-223  | 16394 | mir-23a  | 12207 | mir-218  | 113  | mir-301b  | 1    | mir-324  | 16  | mir-204  | 171   |
| mir-27b  | 817  | mir-29b   | 121  | mir-32   | 6   | mir-206  | 8      | mir-224  | 331   | mir-23b  | 4666  | mir-219b | 2    | mir-3064  | 1    | mir-326  | 2   | mir-205  | 29816 |
| mir-28   | 209  | mir-29c   | 765  | mir-324  | 15  | mir-20a  | 1515   | mir-2277 | 2     | mir-23c  | 78    | mir-22   | 1769 | mir-3065  | 11   | mir-328  | 3   | mir-2054 | 2     |
| mir-296  | 22   | mir-301a  | 87   | mir-326  | 3   | mir-20b  | 77     | mir-2278 | 2     | mir-24   | 17256 | mir-221  | 1191 | mir-30a   | 315  | mir-331  | 10  | mir-206  | 19    |
| mir-299  | 25   | mir-301b  | 8    | mir-328  | 2   | mir-21   | 67716  | mir-2355 | 1     | mir-25   | 1283  | mir-222  | 314  | mir-30b   | 322  | mir-335  | 10  | mir-208b | 7     |
| mir-29a  | 6854 | mir-3065  | 4    | mir-329  | 2   | mir-210  | 2469   | mir-23a  | 9969  | mir-26a  | 5421  | mir-223  | 5879 | mir-30c   | 100  | mir-337  | 8   | mir-20a  | 279   |
| mir-29b  | 1142 | mir-3074  | 1    | mir-331  | 16  | mir-211  | 48     | mir-23b  | 1052  | mir-26b  | 715   | mir-224  | 76   | mir-30d   | 347  | mir-338  | 28  | mir-20b  | 12    |
| mir-29c  | 4155 | mir-30a   | 52   | mir-335  | 4   | mir-2110 | 2      | mir-23c  | 315   | mir-27a  | 5203  | mir-2277 | 3    | mir-30e   | 515  | mir-339  | 34  | mir-21   | 26166 |
| mir-301a | 163  | mir-30b   | 236  | mir-337  | 4   | mir-2114 | 2      | mir-24   | 7876  | mir-27b  | 1331  | mir-2278 | 2    | mir-31    | 3243 | mir-33a  | 6   | mir-210  | 2788  |
| mir-301b | 6    | mir-30c   | 76   | mir-338  | 8   | mir-2116 | 6      | mir-25   | 567   | mir-28   | 434   | mir-2355 | 3    | mir-3127  | 1    | mir-340  | 4   | mir-211  | 2     |
| mir-3064 | 2    | mir-30d   | 240  | mir-339  | 25  | mir-212  | 11     | mir-26a  | 2522  | mir-296  | 33    | mir-23a  | 7233 | mir-3150a | 1    | mir-342  | 129 | mir-2110 | 6     |
| mir-3065 | 11   | mir-30e   | 115  | mir-33a  | 6   | mir-214  | 1920   | mir-26b  | 571   | mir-299  | 10    | mir-23b  | 2098 | mir-3152  | 2    | mir-345  | 10  | mir-2114 | 2     |
| mir-30a  | 213  | mir-31    | 3085 | mir-33b  | 4   | mir-215  | 15     | mir-27a  | 3248  | mir-29a  | 13761 | mir-23c  | 61   | mir-32    | 17   | mir-34a  | 263 | mir-2116 | 4     |
| mir-30b  | 1085 | mir-3120  | 2    | mir-340  | 5   | mir-217  | 8      | mir-27b  | 385   | mir-29b  | 1712  | mir-24   | 7054 | mir-320b  | 2    | mir-34b  | 2   | mir-212  | 5     |
| mir-30c  | 300  | mir-3126  | 2    | mir-342  | 53  | mir-218  | 1112   | mir-28   | 314   | mir-29c  | 4591  | mir-25   | 434  | mir-323a  | 5    | mir-34c  | 9   | mir-214  | 189   |
| mir-30d  | 507  | mir-3127  | 1    | mir-345  | 18  | mir-219a | 1      | mir-296  | 23    | mir-301a | 217   | mir-26a  | 5394 | mir-324   | 33   | mir-3607 | 17  | mir-215  | 87    |
| mir-30e  | 554  | mir-3145  | 6    | mir-34a  | 88  | mir-219b | 10     | mir-299  | 12    | mir-301b | 19    | mir-26b  | 564  | mir-326   | 14   | mir-3609 | 1   | mir-216a | 2     |
| mir-31   | 1471 | mir-3150b | 2    | mir-34b  | 4   | mir-22   | 3255   | mir-29a  | 5394  | mir-3065 | 74    | mir-27a  | 3011 | mir-328   | 14   | mir-361  | 46  | mir-216b | 3     |

|          |     |          |     |          |     |          |       |          |      |           |      |          |      |          |     |          |     |          |      |
|----------|-----|----------|-----|----------|-----|----------|-------|----------|------|-----------|------|----------|------|----------|-----|----------|-----|----------|------|
| mir-3117 | 1   | mir-3152 | 4   | mir-34c  | 4   | mir-221  | 6423  | mir-29b  | 758  | mir-30a   | 139  | mir-27b  | 649  | mir-330  | 5   | mir-3613 | 8   | mir-217  | 2    |
| mir-3126 | 2   | mir-3180 | 2   | mir-3605 | 2   | mir-222  | 3488  | mir-29c  | 1607 | mir-30b   | 3193 | mir-28   | 113  | mir-331  | 74  | mir-3614 | 2   | mir-218  | 37   |
| mir-3140 | 2   | mir-320b | 8   | mir-3607 | 33  | mir-223  | 26470 | mir-301a | 99   | mir-30c   | 257  | mir-296  | 13   | mir-335  | 166 | mir-362  | 15  | mir-219a | 6    |
| mir-3141 | 1   | mir-323a | 7   | mir-361  | 31  | mir-224  | 1186  | mir-302a | 2    | mir-30d   | 1426 | mir-299  | 75   | mir-337  | 20  | mir-365a | 26  | mir-219b | 1    |
| mir-3145 | 2   | mir-324  | 49  | mir-3613 | 23  | mir-2276 | 2     | mir-3065 | 7    | mir-30e   | 916  | mir-29a  | 9687 | mir-338  | 48  | mir-365b | 44  | mir-22   | 545  |
| mir-3152 | 8   | mir-326  | 12  | mir-362  | 10  | mir-2277 | 2     | mir-30a  | 423  | mir-31    | 4419 | mir-29b  | 1742 | mir-339  | 96  | mir-369  | 24  | mir-221  | 4154 |
| mir-3157 | 1   | mir-328  | 58  | mir-365a | 10  | mir-2278 | 6     | mir-30b  | 473  | mir-3117  | 2    | mir-29c  | 4534 | mir-33a  | 10  | mir-374a | 10  | mir-222  | 821  |
| mir-3161 | 2   | mir-329  | 2   | mir-365b | 31  | mir-2355 | 14    | mir-30c  | 106  | mir-3120  | 2    | mir-301a | 88   | mir-33b  | 10  | mir-374b | 16  | mir-223  | 1819 |
| mir-3191 | 1   | mir-330  | 26  | mir-3667 | 1   | mir-23a  | 35647 | mir-30d  | 505  | mir-3126  | 1    | mir-301b | 7    | mir-340  | 22  | mir-375  | 1   | mir-224  | 1306 |
| mir-32   | 32  | mir-331  | 146 | mir-369  | 5   | mir-23b  | 35250 | mir-30e  | 430  | mir-3136  | 3    | mir-3065 | 1    | mir-342  | 289 | mir-376a | 8   | mir-2277 | 2    |
| mir-320b | 8   | mir-335  | 44  | mir-373  | 2   | mir-23c  | 438   | mir-31   | 3961 | mir-3150b | 2    | mir-30a  | 236  | mir-345  | 39  | mir-376b | 2   | mir-2278 | 2    |
| mir-323a | 13  | mir-337  | 8   | mir-374a | 5   | mir-24   | 30615 | mir-3129 | 1    | mir-3158  | 2    | mir-30b  | 1397 | mir-34a  | 573 | mir-376c | 133 | mir-2355 | 3    |
| mir-324  | 32  | mir-338  | 28  | mir-374b | 16  | mir-2467 | 2     | mir-3173 | 6    | mir-3173  | 4    | mir-30c  | 196  | mir-34b  | 176 | mir-377  | 2   | mir-23a  | 5307 |
| mir-326  | 16  | mir-339  | 170 | mir-376a | 6   | mir-25   | 13266 | mir-3186 | 3    | mir-32    | 32   | mir-30d  | 857  | mir-34c  | 168 | mir-378a | 17  | mir-23b  | 1637 |
| mir-328  | 18  | mir-33a  | 10  | mir-376b | 8   | mir-26a  | 18552 | mir-32   | 12   | mir-320b  | 4    | mir-30e  | 615  | mir-3607 | 49  | mir-379  | 5   | mir-23c  | 297  |
| mir-329  | 4   | mir-33b  | 2   | mir-376c | 207 | mir-26b  | 2171  | mir-320b | 14   | mir-323a  | 9    | mir-31   | 1321 | mir-361  | 104 | mir-381  | 10  | mir-24   | 3793 |
| mir-330  | 5   | mir-340  | 18  | mir-378a | 25  | mir-27a  | 16735 | mir-323a | 29   | mir-323b  | 8    | mir-3115 | 2    | mir-3613 | 88  | mir-382  | 5   | mir-2467 | 34   |
| mir-331  | 139 | mir-342  | 347 | mir-379  | 10  | mir-27b  | 8014  | mir-323b | 4    | mir-324   | 286  | mir-3117 | 3    | mir-362  | 50  | mir-3944 | 1   | mir-25   | 1189 |
| mir-335  | 91  | mir-345  | 140 | mir-3928 | 1   | mir-28   | 951   | mir-324  | 63   | mir-326   | 60   | mir-3129 | 1    | mir-363  | 8   | mir-409  | 9   | mir-26a  | 969  |
| mir-337  | 33  | mir-34a  | 171 | mir-3960 | 2   | mir-296  | 1140  | mir-326  | 37   | mir-328   | 32   | mir-3140 | 2    | mir-3659 | 2   | mir-410  | 2   | mir-26b  | 514  |
| mir-338  | 50  | mir-34b  | 5   | mir-409  | 9   | mir-299  | 26    | mir-328  | 68   | mir-329   | 4    | mir-3144 | 2    | mir-365a | 40  | mir-423  | 28  | mir-27a  | 2059 |
| mir-     | 188 | mir-34c  | 22  | mir-410  | 2   | mir-29a  | 59638 | mir-     | 10   | mir-330   | 4    | mir-     | 2    | mir-     | 63  | mir-     | 348 | mir-     | 598  |

|          |     |          |     |          |     |           |       |          |      |          |      |          |      |          |      |          |     |          |      |  |
|----------|-----|----------|-----|----------|-----|-----------|-------|----------|------|----------|------|----------|------|----------|------|----------|-----|----------|------|--|
| 339      |     |          |     |          |     |           |       | 329      |      |          |      |          | 3157 |          | 365b |          | 424 |          | 27b  |  |
| mir-33a  | 32  | mir-3607 | 33  | mir-411  | 1   | mir-29b   | 7020  | mir-330  | 8    | mir-331  | 132  | mir-3160 | 4    | mir-369  | 8    | mir-425  | 99  | mir-28   | 169  |  |
| mir-33b  | 2   | mir-361  | 102 | mir-423  | 8   | mir-29c   | 25481 | mir-331  | 101  | mir-335  | 106  | mir-3177 | 2    | mir-374a | 32   | mir-4270 | 4   | mir-2861 | 1    |  |
| mir-340  | 28  | mir-3613 | 4   | mir-424  | 271 | mir-301a  | 1811  | mir-335  | 53   | mir-337  | 27   | mir-3189 | 1    | mir-374b | 70   | mir-429  | 12  | mir-296  | 6    |  |
| mir-342  | 550 | mir-362  | 4   | mir-425  | 58  | mir-301b  | 287   | mir-337  | 26   | mir-338  | 28   | mir-3194 | 4    | mir-375  | 12   | mir-4300 | 2   | mir-298  | 4    |  |
| mir-345  | 62  | mir-363  | 41  | mir-429  | 14  | mir-3064  | 5     | mir-338  | 22   | mir-339  | 856  | mir-32   | 9    | mir-376a | 20   | mir-432  | 2   | mir-299  | 2    |  |
| mir-34a  | 446 | mir-3659 | 2   | mir-4300 | 4   | mir-3065  | 39    | mir-339  | 236  | mir-33a  | 122  | mir-320b | 9    | mir-376b | 12   | mir-4417 | 20  | mir-29a  | 3417 |  |
| mir-34b  | 17  | mir-365a | 76  | mir-4433 | 2   | mir-3074  | 16    | mir-33a  | 34   | mir-33b  | 9    | mir-323a | 18   | mir-376c | 162  | mir-4433 | 2   | mir-29b  | 974  |  |
| mir-34c  | 38  | mir-365b | 141 | mir-4500 | 6   | mir-30a   | 2641  | mir-340  | 49   | mir-340  | 33   | mir-323b | 21   | mir-378a | 100  | mir-4500 | 6   | mir-29c  | 3401 |  |
| mir-3605 | 6   | mir-367  | 1   | mir-452  | 2   | mir-30b   | 4363  | mir-342  | 684  | mir-342  | 1674 | mir-324  | 185  | mir-379  | 2    | mir-452  | 7   | mir-301a | 242  |  |
| mir-3607 | 14  | mir-3679 | 2   | mir-4521 | 2   | mir-30c   | 1259  | mir-345  | 96   | mir-345  | 326  | mir-326  | 357  | mir-381  | 5    | mir-454  | 7   | mir-301b | 19   |  |
| mir-3609 | 1   | mir-369  | 2   | mir-454  | 6   | mir-30d   | 1394  | mir-34a  | 1371 | mir-34a  | 2106 | mir-328  | 68   | mir-382  | 10   | mir-455  | 6   | mir-302a | 3    |  |
| mir-361  | 182 | mir-370  | 4   | mir-455  | 21  | mir-30e   | 3530  | mir-34b  | 37   | mir-34b  | 81   | mir-329  | 8    | mir-3934 | 1    | mir-4738 | 2   | mir-302d | 1    |  |
| mir-3613 | 47  | mir-374a | 12  | mir-466  | 2   | mir-31    | 15782 | mir-34c  | 66   | mir-34c  | 251  | mir-330  | 11   | mir-3960 | 10   | mir-4758 | 1   | mir-302e | 3    |  |
| mir-362  | 65  | mir-374b | 40  | mir-4684 | 1   | mir-3117  | 5     | mir-3607 | 9    | mir-3607 | 28   | mir-331  | 270  | mir-409  | 12   | mir-4777 | 1   | mir-3065 | 1    |  |
| mir-363  | 32  | mir-376a | 6   | mir-4745 | 2   | mir-3120  | 4     | mir-3609 | 7    | mir-3609 | 1    | mir-335  | 24   | mir-423  | 47   | mir-4779 | 1   | mir-3074 | 1    |  |
| mir-365a | 76  | mir-376b | 16  | mir-4747 | 1   | mir-3124  | 2     | mir-361  | 204  | mir-361  | 413  | mir-337  | 133  | mir-424  | 711  | mir-4783 | 2   | mir-30a  | 178  |  |
| mir-365b | 129 | mir-376c | 97  | mir-4753 | 4   | mir-3135a | 6     | mir-3613 | 93   | mir-3613 | 137  | mir-338  | 78   | mir-425  | 373  | mir-483  | 3   | mir-30b  | 839  |  |
| mir-3665 | 1   | mir-377  | 1   | mir-4763 | 2   | mir-3136  | 4     | mir-3617 | 8    | mir-3614 | 2    | mir-339  | 388  | mir-429  | 85   | mir-484  | 35  | mir-30c  | 102  |  |
| mir-3667 | 1   | mir-378a | 114 | mir-4778 | 2   | mir-3140  | 2     | mir-362  | 14   | mir-3619 | 1    | mir-33a  | 36   | mir-4293 | 1    | mir-487a | 2   | mir-30d  | 545  |  |
| mir-3675 | 1   | mir-379  | 2   | mir-4783 | 8   | mir-3144  | 8     | mir-3620 | 6    | mir-362  | 73   | mir-33b  | 8    | mir-4417 | 22   | mir-487b | 8   | mir-30e  | 526  |  |
| mir-3678 | 2   | mir-381  | 15  | mir-4800 | 1   | mir-3145  | 15    | mir-363  | 37   | mir-3620 | 6    | mir-340  | 115  | mir-4423 | 2    | mir-494  | 7   | mir-31   | 1387 |  |

|          |     |           |     |          |    |           |      |          |     |          |     |           |      |          |     |          |    |           |    |
|----------|-----|-----------|-----|----------|----|-----------|------|----------|-----|----------|-----|-----------|------|----------|-----|----------|----|-----------|----|
| mir-3679 | 4   | mir-382   | 12  | mir-483  | 6  | mir-3150a | 3    | mir-365a | 134 | mir-363  | 36  | mir-342   | 1056 | mir-449b | 2   | mir-495  | 20 | mir-3120  | 2  |
| mir-369  | 26  | mir-3940  | 2   | mir-484  | 94 | mir-3158  | 2    | mir-365b | 273 | mir-365a | 142 | mir-345   | 129  | mir-449c | 2   | mir-497  | 14 | mir-3122  | 1  |
| mir-370  | 6   | mir-409   | 14  | mir-485  | 4  | mir-3161  | 2    | mir-3667 | 1   | mir-365b | 274 | mir-346   | 2    | mir-4500 | 31  | mir-499a | 4  | mir-3126  | 1  |
| mir-371a | 1   | mir-411   | 4   | mir-487a | 2  | mir-3162  | 4    | mir-3675 | 1   | mir-369  | 7   | mir-34a   | 3236 | mir-452  | 27  | mir-5007 | 1  | mir-3131  | 4  |
| mir-371b | 1   | mir-412   | 2   | mir-487b | 5  | mir-3173  | 11   | mir-3679 | 2   | mir-3691 | 1   | mir-34b   | 19   | mir-454  | 28  | mir-5008 | 4  | mir-3135a | 4  |
| mir-374a | 87  | mir-423   | 237 | mir-489  | 2  | mir-3177  | 3    | mir-369  | 30  | mir-370  | 1   | mir-34c   | 30   | mir-455  | 73  | mir-500a | 2  | mir-3140  | 1  |
| mir-374b | 150 | mir-424   | 292 | mir-493  | 4  | mir-3180  | 2    | mir-370  | 6   | mir-371a | 2   | mir-3591  | 2    | mir-4646 | 2   | mir-501  | 8  | mir-3144  | 28 |
| mir-374c | 3   | mir-425   | 298 | mir-494  | 2  | mir-3187  | 2    | mir-371b | 1   | mir-371b | 1   | mir-3605  | 1    | mir-4649 | 4   | mir-502  | 8  | mir-3150b | 2  |
| mir-375  | 5   | mir-429   | 61  | mir-495  | 15 | mir-3194  | 14   | mir-373  | 2   | mir-374a | 56  | mir-3607  | 7    | mir-4676 | 2   | mir-504  | 2  | mir-3155a | 2  |
| mir-376a | 95  | mir-4293  | 1   | mir-497  | 17 | mir-32    | 244  | mir-374a | 27  | mir-374b | 146 | mir-361   | 275  | mir-4685 | 1   | mir-505  | 10 | mir-3157  | 2  |
| mir-376b | 35  | mir-4300  | 3   | mir-499a | 4  | mir-3200  | 8    | mir-374b | 52  | mir-374c | 2   | mir-3613  | 167  | mir-4697 | 1   | mir-5100 | 3  | mir-3159  | 4  |
| mir-376c | 455 | mir-431   | 2   | mir-5008 | 4  | mir-320b  | 4    | mir-375  | 3   | mir-376a | 37  | mir-3614  | 6    | mir-4704 | 2   | mir-512  | 8  | mir-3160  | 8  |
| mir-377  | 7   | mir-432   | 1   | mir-501  | 4  | mir-323a  | 50   | mir-376a | 50  | mir-376b | 6   | mir-3617  | 2    | mir-4707 | 2   | mir-515  | 4  | mir-3161  | 1  |
| mir-378a | 134 | mir-4417  | 2   | mir-502  | 3  | mir-323b  | 60   | mir-376b | 25  | mir-376c | 360 | mir-362   | 155  | mir-4726 | 2   | mir-517a | 8  | mir-3162  | 4  |
| mir-379  | 19  | mir-4423  | 2   | mir-505  | 15 | mir-324   | 1282 | mir-376c | 464 | mir-377  | 2   | mir-3622a | 4    | mir-4727 | 1   | mir-517b | 21 | mir-3173  | 2  |
| mir-380  | 2   | mir-4500  | 17  | mir-5100 | 3  | mir-326   | 611  | mir-377  | 2   | mir-378a | 882 | mir-363   | 20   | mir-4733 | 1   | mir-517c | 8  | mir-3186  | 2  |
| mir-381  | 18  | mir-452   | 15  | mir-512  | 8  | mir-328   | 179  | mir-378a | 122 | mir-379  | 16  | mir-365a  | 76   | mir-4745 | 2   | mir-518c | 18 | mir-3187  | 3  |
| mir-382  | 40  | mir-4521  | 2   | mir-515  | 16 | mir-329   | 14   | mir-379  | 16  | mir-380  | 2   | mir-365b  | 162  | mir-4758 | 10  | mir-519a | 2  | mir-3190  | 2  |
| mir-3912 | 1   | mir-4524a | 1   | mir-517  | 1  | mir-330   | 50   | mir-380  | 2   | mir-381  | 2   | mir-3667  | 3    | mir-4802 | 1   | mir-519b | 6  | mir-3191  | 1  |
| mir-3928 | 1   | mir-454   | 54  | mir-517a | 10 | mir-331   | 1750 | mir-381  | 7   | mir-382  | 15  | mir-3679  | 4    | mir-483  | 5   | mir-519d | 13 | mir-3192  | 2  |
| mir-3940 | 2   | mir-455   | 135 | mir-517b | 9  | mir-335   | 1859 | mir-382  | 27  | mir-3912 | 2   | mir-3680  | 2    | mir-484  | 192 | mir-520c | 2  | mir-3194  | 2  |
| mir-     | 4   | mir-      | 2   | mir-     | 6  | mir-337   | 180  | mir-     | 8   | mir-     | 2   | mir-369   | 23   | mir-     | 8   | mir-     | 1  | mir-32    | 60 |

|           |     |          |     |          |    |           |      |           |      |           |      |          |      |          |    |          |    |          |      |
|-----------|-----|----------|-----|----------|----|-----------|------|-----------|------|-----------|------|----------|------|----------|----|----------|----|----------|------|
| 3944      |     | 4639     |     | 517c     |    |           |      | 3928      |      | 3925      |      |          |      | 487b     |    | 520d     |    |          |      |
| mir-3972  | 1   | mir-4640 | 3   | mir-518c | 22 | mir-338   | 111  | mir-3940  | 24   | mir-3934  | 2    | mir-370  | 35   | mir-491  | 3  | mir-520g | 6  | mir-320b | 14   |
| mir-409   | 55  | mir-4676 | 8   | mir-518d | 1  | mir-339   | 4267 | mir-3941  | 2    | mir-3960  | 2    | mir-371a | 1    | mir-493  | 16 | mir-521  | 2  | mir-323a | 8    |
| mir-411   | 10  | mir-4689 | 1   | mir-518e | 1  | mir-33a   | 435  | mir-3944  | 4    | mir-409   | 68   | mir-374a | 22   | mir-494  | 3  | mir-523  | 2  | mir-323b | 5    |
| mir-423   | 124 | mir-4713 | 1   | mir-518f | 1  | mir-33b   | 70   | mir-3972  | 2    | mir-411   | 9    | mir-374b | 88   | mir-495  | 14 | mir-525  | 2  | mir-324  | 73   |
| mir-424   | 959 | mir-4742 | 2   | mir-5195 | 1  | mir-340   | 549  | mir-409   | 86   | mir-423   | 541  | mir-374c | 2    | mir-497  | 54 | mir-532  | 48 | mir-326  | 13   |
| mir-425   | 484 | mir-4749 | 2   | mir-519a | 3  | mir-342   | 6456 | mir-411   | 6    | mir-424   | 1499 | mir-375  | 3    | mir-5008 | 6  | mir-539  | 2  | mir-328  | 9    |
| mir-4270  | 1   | mir-4753 | 2   | mir-519b | 14 | mir-345   | 2866 | mir-423   | 269  | mir-425   | 1286 | mir-376a | 285  | mir-501  | 8  | mir-542  | 4  | mir-331  | 100  |
| mir-429   | 96  | mir-4777 | 1   | mir-519c | 2  | mir-34a   | 2703 | mir-424   | 1254 | mir-4260  | 1    | mir-376b | 56   | mir-502  | 13 | mir-543  | 2  | mir-335  | 59   |
| mir-4300  | 1   | mir-4781 | 2   | mir-519d | 43 | mir-34b   | 430  | mir-425   | 794  | mir-429   | 224  | mir-376c | 1643 | mir-503  | 6  | mir-545  | 1  | mir-337  | 17   |
| mir-432   | 6   | mir-4787 | 2   | mir-519e | 2  | mir-34c   | 837  | mir-4270  | 4    | mir-4300  | 1    | mir-377  | 14   | mir-505  | 43 | mir-548q | 2  | mir-338  | 40   |
| mir-4330  | 2   | mir-483  | 4   | mir-520a | 2  | mir-3605  | 13   | mir-429   | 44   | mir-432   | 2    | mir-378a | 736  | mir-5100 | 1  | mir-551b | 8  | mir-339  | 154  |
| mir-4433  | 2   | mir-484  | 301 | mir-520c | 4  | mir-3607  | 24   | mir-4300  | 3    | mir-433   | 2    | mir-379  | 97   | mir-515  | 2  | mir-5571 | 1  | mir-33a  | 52   |
| mir-4433b | 4   | mir-485  | 3   | mir-520e | 1  | mir-3609  | 6    | mir-4310  | 1    | mir-4423  | 2    | mir-380  | 4    | mir-517a | 8  | mir-574  | 84 | mir-33b  | 16   |
| mir-4477a | 2   | mir-486  | 4   | mir-520f | 2  | mir-361   | 749  | mir-432   | 6    | mir-4446  | 1    | mir-381  | 104  | mir-517b | 22 | mir-576  | 2  | mir-340  | 12   |
| mir-4500  | 7   | mir-487a | 3   | mir-520g | 2  | mir-3611  | 8    | mir-433   | 2    | 4500      | 126  | mir-382  | 94   | mir-517c | 7  | mir-582  | 6  | mir-342  | 200  |
| mir-450a  | 8   | mir-487b | 8   | mir-521  | 2  | mir-3613  | 240  | mir-4423  | 1    | mir-452   | 208  | mir-3924 | 2    | mir-518c | 11 | mir-589  | 2  | mir-345  | 222  |
| mir-452   | 51  | mir-489  | 2   | mir-523  | 2  | mir-3614  | 3    | mir-4433  | 8    | mir-4520b | 2    | mir-3941 | 1    | mir-518e | 5  | mir-590  | 45 | mir-34a  | 1116 |
| mir-4521  | 5   | mir-493  | 16  | mir-524  | 2  | mir-3619  | 2    | mir-4433b | 8    | mir-4521  | 13   | mir-3944 | 2    | mir-519a | 2  | mir-598  | 2  | mir-34b  | 112  |
| mir-4536  | 2   | mir-494  | 7   | mir-525  | 3  | mir-362   | 230  | mir-4480  | 2    | mir-4524a | 1    | mir-3960 | 1    | mir-519b | 1  | mir-615  | 2  | mir-34c  | 121  |
| mir-454   | 28  | mir-495  | 7   | mir-532  | 42 | mir-3620  | 11   | mir-449b  | 3    | mir-4539  | 2    | mir-409  | 222  | mir-519d | 10 | mir-616  | 2  | mir-3607 | 53   |
| mir-455   | 121 | mir-497  | 29  | mir-539  | 2  | mir-3622a | 2    | mir-4500  | 35   | mir-454   | 170  | mir-410  | 6    | mir-520f | 1  | mir-619  | 2  | mir-3609 | 25   |

|          |    |          |     |           |     |          |      |          |     |           |     |           |     |           |     |           |    |          |     |
|----------|----|----------|-----|-----------|-----|----------|------|----------|-----|-----------|-----|-----------|-----|-----------|-----|-----------|----|----------|-----|
| mir-4646 | 4  | mir-499a | 4   | mir-542   | 8   | mir-363  | 24   | mir-450a | 2   | mir-455   | 243 | mir-411   | 35  | mir-520g  | 4   | mir-625   | 8  | mir-361  | 111 |
| mir-4649 | 1  | mir-5006 | 1   | mir-543   | 10  | mir-3659 | 2    | mir-450b | 2   | mir-4638  | 2   | mir-423   | 472 | mir-522   | 8   | mir-627   | 1  | mir-3611 | 1   |
| mir-4652 | 2  | mir-500a | 6   | mir-545   | 1   | mir-365a | 688  | mir-452  | 41  | mir-4639  | 2   | mir-424   | 879 | mir-532   | 124 | mir-628   | 1  | mir-3613 | 46  |
| mir-466  | 8  | mir-501  | 7   | mir-548ba | 1   | mir-365b | 1340 | mir-4521 | 1   | mir-4640  | 1   | mir-425   | 532 | mir-542   | 8   | mir-629   | 3  | mir-3614 | 3   |
| mir-4664 | 4  | mir-502  | 11  | mir-556   | 2   | mir-3663 | 1    | mir-454  | 74  | mir-4652  | 2   | mir-429   | 19  | mir-543   | 1   | mir-6503  | 1  | mir-362  | 86  |
| mir-4668 | 8  | mir-503  | 6   | mir-5582  | 1   | mir-3664 | 17   | mir-455  | 226 | mir-466   | 6   | mir-4300  | 1   | mir-545   | 1   | mir-651   | 2  | mir-363  | 20  |
| mir-4685 | 20 | mir-505  | 61  | mir-5591  | 4   | mir-3665 | 1    | mir-4646 | 2   | mir-4662a | 2   | mir-431   | 2   | mir-548at | 10  | mir-6514  | 2  | mir-3649 | 2   |
| mir-4687 | 7  | mir-5089 | 2   | mir-5699  | 2   | mir-3667 | 6    | mir-4652 | 1   | mir-4664  | 2   | mir-432   | 12  | mir-548b  | 2   | mir-652   | 13 | mir-365a | 56  |
| mir-4697 | 2  | mir-5100 | 7   | mir-570   | 4   | mir-3677 | 4    | mir-4664 | 1   | mir-4665  | 1   | mir-433   | 9   | mir-548e  | 4   | mir-654   | 3  | mir-365b | 88  |
| mir-4700 | 4  | mir-512  | 2   | mir-574   | 100 | mir-3679 | 2    | mir-4684 | 2   | mir-4667  | 2   | mir-4423  | 3   | mir-548t  | 2   | mir-656   | 2  | mir-3664 | 2   |
| mir-4707 | 3  | mir-517a | 4   | mir-590   | 16  | mir-3681 | 18   | mir-4687 | 2   | mir-4676  | 2   | mir-4482  | 2   | mir-551b  | 2   | mir-660   | 54 | mir-3667 | 2   |
| mir-4716 | 1  | mir-517b | 8   | mir-625   | 10  | mir-3685 | 4    | mir-4690 | 2   | mir-4677  | 2   | mir-449c  | 2   | mir-561   | 2   | mir-664a  | 6  | mir-3675 | 2   |
| mir-4725 | 2  | mir-518c | 2   | mir-628   | 2   | mir-369  | 45   | mir-4697 | 2   | mir-4687  | 2   | mir-4500  | 56  | mir-570   | 4   | mir-671   | 13 | mir-369  | 11  |
| mir-4726 | 2  | mir-519a | 4   | mir-642a  | 2   | mir-3691 | 1    | mir-4700 | 2   | mir-4697  | 2   | mir-452   | 34  | mir-574   | 228 | mir-6742  | 1  | mir-3692 | 4   |
| mir-4741 | 4  | mir-519b | 2   | mir-652   | 14  | mir-370  | 20   | mir-4707 | 20  | mir-4700  | 1   | mir-4524a | 4   | mir-576   | 7   | mir-676   | 2  | mir-370  | 4   |
| mir-4742 | 10 | mir-519d | 8   | mir-654   | 7   | mir-3713 | 2    | mir-4716 | 3   | mir-4709  | 2   | mir-454   | 32  | mir-579   | 4   | mir-6763  | 1  | mir-371a | 2   |
| mir-4745 | 4  | mir-520g | 10  | mir-655   | 2   | mir-371b | 2    | mir-4722 | 4   | mir-4713  | 2   | mir-455   | 115 | mir-582   | 12  | mir-6769b | 2  | mir-373  | 4   |
| mir-4750 | 9  | mir-524  | 4   | mir-659   | 2   | mir-373  | 5    | mir-4731 | 1   | mir-4726  | 2   | mir-4649  | 8   | mir-584   | 3   | mir-6777  | 2  | mir-374a | 59  |
| mir-4753 | 6  | mir-532  | 134 | mir-660   | 9   | mir-374a | 239  | mir-4735 | 1   | mir-4728  | 2   | mir-466   | 2   | mir-589   | 2   | mir-6811  | 2  | mir-374b | 95  |
| mir-4777 | 1  | mir-542  | 11  | mir-664a  | 6   | mir-374b | 738  | mir-4741 | 4   | mir-4742  | 2   | mir-4664  | 2   | mir-590   | 147 | mir-6816  | 1  | mir-376a | 16  |
| mir-4783 | 2  | mir-543  | 8   | mir-664b  | 2   | mir-374c | 6    | mir-4742 | 4   | mir-4749  | 2   | mir-4677  | 6   | mir-615   | 2   | mir-6819  | 2  | mir-376b | 18  |
| mir-     | 2  | mir-545  | 4   | mir-671   | 3   | mir-     | 210  | mir-     | 2   | mir-      | 4   | mir-      | 8   | mir-      | 3   | mir-      | 2  | mir-     | 73  |

|          |     |          |     |           |    |          |      |          |     |          |     |          |     |           |    |          |     |          |      |
|----------|-----|----------|-----|-----------|----|----------|------|----------|-----|----------|-----|----------|-----|-----------|----|----------|-----|----------|------|
| 4786     |     |          |     |           |    | 376a     |      | 4743     |     | 4758     |     | 4685     |     | 616       |    | 6823     |     | 376c     |      |
| mir-4794 | 1   | mir-548a | 4   | mir-6715b | 2  | mir-376b | 116  | mir-4745 | 2   | mir-4778 | 4   | mir-4700 | 1   | mir-619   | 4  | mir-6824 | 1   | mir-377  | 6    |
| mir-4799 | 1   | mir-548b | 2   | mir-6722  | 2  | mir-376c | 1534 | mir-4750 | 8   | mir-4798 | 2   | mir-4708 | 1   | mir-625   | 10 | mir-6857 | 1   | mir-378a | 183  |
| mir-4800 | 1   | mir-548d | 2   | mir-6734  | 1  | mir-377  | 8    | mir-4753 | 2   | mir-483  | 18  | mir-4726 | 4   | mir-627   | 2  | mir-6858 | 1   | mir-379  | 2    |
| mir-4801 | 2   | mir-548q | 2   | mir-675   | 1  | mir-378a | 2124 | mir-4758 | 1   | mir-484  | 822 | mir-4731 | 2   | mir-628   | 2  | mir-6865 | 2   | mir-381  | 3    |
| mir-4802 | 2   | mir-550a | 4   | mir-6786  | 2  | mir-378f | 4    | mir-4764 | 1   | mir-485  | 2   | mir-4742 | 2   | mir-629   | 2  | mir-6881 | 2   | mir-382  | 3    |
| mir-483  | 15  | mir-551a | 20  | mir-6791  | 3  | mir-379  | 48   | mir-4778 | 2   | mir-486  | 4   | mir-4745 | 1   | mir-642a  | 1  | mir-6887 | 2   | mir-383  | 1    |
| mir-484  | 165 | mir-551b | 4   | mir-6814  | 1  | mir-380  | 4    | mir-4783 | 2   | mir-487a | 2   | mir-4747 | 2   | mir-6503  | 5  | mir-7    | 18  | mir-3917 | 2    |
| mir-486  | 24  | mir-574  | 543 | mir-6844  | 4  | mir-381  | 46   | mir-4801 | 2   | mir-487b | 25  | mir-4750 | 1   | mir-6511b | 4  | mir-708  | 76  | mir-3922 | 1    |
| mir-487a | 1   | mir-576  | 5   | mir-6853  | 2  | mir-382  | 39   | mir-483  | 9   | mir-489  | 18  | mir-4783 | 2   | mir-652   | 35 | mir-7109 | 2   | mir-3925 | 2    |
| mir-487b | 38  | mir-582  | 2   | mir-6854  | 1  | mir-383  | 105  | mir-484  | 830 | mir-491  | 1   | mir-4795 | 1   | mir-654   | 4  | mir-744  | 4   | mir-3928 | 1    |
| mir-491  | 4   | mir-585  | 3   | mir-6870  | 2  | mir-3912 | 11   | mir-485  | 12  | mir-493  | 14  | mir-4802 | 1   | mir-660   | 82 | mir-767  | 2   | mir-3934 | 2    |
| mir-493  | 20  | mir-590  | 43  | mir-6875  | 1  | mir-3922 | 1    | mir-486  | 31  | mir-494  | 12  | mir-483  | 23  | mir-664a  | 27 | mir-769  | 2   | mir-3940 | 2    |
| mir-494  | 13  | mir-598  | 4   | mir-6878  | 2  | mir-3928 | 6    | mir-487a | 1   | mir-495  | 17  | mir-484  | 639 | mir-664b  | 2  | mir-874  | 2   | mir-3944 | 8    |
| mir-495  | 23  | mir-615  | 28  | mir-6891  | 1  | mir-3934 | 4    | mir-487b | 45  | mir-497  | 72  | mir-485  | 39  | mir-671   | 22 | mir-877  | 1   | mir-3960 | 33   |
| mir-497  | 105 | mir-619  | 2   | mir-7     | 5  | mir-3940 | 39   | mir-489  | 4   | mir-499a | 2   | mir-486  | 26  | mir-6749  | 2  | mir-885  | 1   | mir-3972 | 4    |
| mir-499a | 1   | mir-624  | 2   | mir-708   | 24 | mir-3960 | 11   | mir-493  | 42  | mir-499b | 1   | mir-487a | 18  | mir-6752  | 2  | mir-887  | 1   | mir-409  | 13   |
| mir-5008 | 16  | mir-625  | 51  | mir-7110  | 1  | mir-3972 | 5    | mir-494  | 31  | mir-5000 | 2   | mir-487b | 178 | mir-6756  | 2  | mir-92a  | 102 | mir-411  | 5    |
| mir-500a | 11  | mir-627  | 1   | mir-7157  | 1  | mir-409  | 181  | mir-495  | 44  | mir-5008 | 2   | mir-489  | 10  | mir-6757  | 1  | mir-92b  | 2   | mir-423  | 107  |
| mir-500b | 1   | mir-628  | 5   | mir-7162  | 1  | mir-410  | 3    | mir-497  | 41  | mir-500a | 11  | mir-491  | 3   | mir-6767  | 2  | mir-93   | 71  | mir-424  | 1907 |
| mir-501  | 7   | mir-629  | 13  | mir-744   | 7  | mir-411  | 13   | mir-499a | 8   | mir-500b | 2   | mir-493  | 77  | mir-6777  | 1  | mir-95   | 8   | mir-425  | 735  |
| mir-502  | 41  | mir-6502 | 3   | mir-766   | 6  | mir-412  | 2    | mir-5002 | 8   | mir-501  | 21  | mir-494  | 103 | mir-6781  | 2  | mir-98   | 30  | mir-4251 | 2    |

|          |    |          |     |          |     |          |      |          |    |          |    |          |     |          |     |         |     |           |     |
|----------|----|----------|-----|----------|-----|----------|------|----------|----|----------|----|----------|-----|----------|-----|---------|-----|-----------|-----|
| mir-503  | 3  | mir-6503 | 1   | mir-769  | 4   | mir-422a | 2    | mir-5003 | 1  | mir-502  | 31 | mir-495  | 58  | mir-6786 | 1   | mir-99a | 327 | mir-429   | 94  |
| mir-504  | 4  | mir-651  | 2   | mir-7854 | 2   | mir-423  | 602  | mir-5004 | 1  | mir-503  | 28 | mir-497  | 268 | mir-6802 | 1   | mir-99b | 145 | mir-4293  | 1   |
| mir-505  | 48 | mir-652  | 68  | mir-874  | 4   | mir-424  | 4127 | mir-5006 | 1  | mir-504  | 2  | mir-499a | 24  | mir-6820 | 2   |         |     | mir-4300  | 3   |
| mir-506  | 2  | mir-654  | 9   | mir-885  | 1   | mir-425  | 7221 | mir-5008 | 2  | mir-505  | 93 | mir-5001 | 2   | mir-6822 | 1   |         |     | mir-4320  | 4   |
| mir-5100 | 8  | mir-656  | 2   | mir-887  | 1   | mir-4251 | 2    | mir-500a | 2  | mir-5089 | 1  | mir-5008 | 6   | mir-6849 | 2   |         |     | mir-433   | 8   |
| mir-512  | 8  | mir-659  | 1   | mir-889  | 2   | mir-4270 | 16   | mir-501  | 11 | mir-510  | 2  | mir-500a | 29  | mir-6868 | 2   |         |     | mir-4417  | 742 |
| mir-513b | 2  | mir-660  | 44  | mir-92a  | 43  | mir-429  | 1393 | mir-502  | 15 | mir-5100 | 5  | mir-500b | 1   | mir-6873 | 2   |         |     | mir-4425  | 5   |
| mir-515  | 4  | mir-664a | 111 | mir-92b  | 13  | mir-4300 | 10   | mir-503  | 23 | mir-511  | 2  | mir-501  | 46  | mir-7    | 59  |         |     | mir-4430  | 20  |
| mir-517a | 6  | mir-664b | 4   | mir-93   | 173 | mir-431  | 24   | mir-504  | 2  | mir-512  | 2  | mir-5010 | 4   | mir-708  | 410 |         |     | mir-4433  | 2   |
| mir-517b | 21 | mir-665  | 1   | mir-95   | 12  | mir-4310 | 1    | mir-505  | 86 | mir-514b | 2  | mir-502  | 53  | mir-744  | 24  |         |     | mir-4433b | 4   |
| mir-5189 | 2  | mir-671  | 36  | mir-96   | 4   | mir-4320 | 1    | mir-508  | 1  | mir-515  | 4  | mir-503  | 24  | mir-767  | 13  |         |     | mir-4472  | 8   |
| mir-518c | 12 | mir-6742 | 1   | mir-98   | 28  | mir-433  | 12   | mir-5089 | 2  | mir-517a | 12 | mir-505  | 60  | mir-769  | 5   |         |     | mir-4500  | 43  |
| mir-518d | 2  | mir-675  | 4   | mir-99a  | 670 | mir-4330 | 1    | mir-5100 | 13 | mir-517b | 34 | mir-5100 | 26  | mir-874  | 6   |         |     | mir-450b  | 4   |
| mir-518e | 3  | mir-6751 | 2   | mir-99b  | 203 | mir-4417 | 2    | mir-512  | 8  | mir-517c | 2  | mir-511  | 4   | mir-877  | 7   |         |     | mir-452   | 305 |
| mir-518f | 1  | mir-6752 | 2   |          |     | mir-4423 | 14   | mir-515  | 6  | mir-5187 | 2  | mir-512  | 8   | mir-887  | 8   |         |     | mir-4520b | 1   |
| mir-519a | 4  | mir-676  | 1   |          |     | mir-4430 | 6    | mir-517a | 12 | mir-518c | 8  | mir-517a | 12  | mir-889  | 4   |         |     | mir-4521  | 10  |
| mir-519b | 6  | mir-6762 | 2   |          |     | mir-4433 | 2    | mir-517b | 25 | mir-519a | 5  | mir-517b | 8   | mir-92a  | 149 |         |     | mir-4524a | 1   |
| mir-519d | 22 | mir-6767 | 2   |          |     | mir-4480 | 4    | mir-517c | 10 | mir-519b | 6  | mir-517c | 1   | mir-92b  | 11  |         |     | mir-4529  | 13  |
| mir-519e | 2  | mir-6777 | 2   |          |     | mir-449b | 2    | mir-518c | 10 | mir-519c | 2  | mir-518c | 8   | mir-93   | 851 |         |     | mir-4539  | 1   |
| mir-520a | 3  | mir-6781 | 2   |          |     | mir-4500 | 642  | mir-519a | 2  | mir-519d | 17 | mir-518d | 1   | mir-938  | 1   |         |     | mir-454   | 78  |
| mir-520d | 1  | mir-6784 | 1   |          |     | mir-450a | 6    | mir-519b | 14 | mir-519e | 4  | mir-519a | 4   | mir-940  | 6   |         |     | mir-455   | 123 |
| mir-     | 4  | mir-     | 2   |          |     | mir-     | 16   | mir-     | 2  | mir-     | 2  | mir-     | 30  | mir-     | 18  |         |     | mir-      | 2   |

|           |     |          |     |
|-----------|-----|----------|-----|
| 520g      |     | 6789     |     |
| mir-521   | 2   | mir-6791 | 2   |
| mir-525   | 6   | mir-6795 | 2   |
| mir-532   | 174 | mir-6796 | 2   |
| mir-539   | 6   | mir-6797 | 2   |
| mir-542   | 20  | mir-6803 | 2   |
| mir-543   | 6   | mir-6807 | 1   |
| mir-545   | 3   | mir-6810 | 2   |
| mir-548ac | 2   | mir-6816 | 2   |
| mir-548ao | 2   | mir-6822 | 7   |
| mir-548ap | 2   | mir-6830 | 1   |
| mir-548aq | 2   | mir-6837 | 1   |
| mir-548ar | 2   | mir-6850 | 1   |
| mir-548b  | 4   | mir-6855 | 2   |
| mir-548d  | 4   | mir-6869 | 1   |
| mir-548t  | 5   | mir-6873 | 2   |
| mir-550a  | 2   | mir-6882 | 2   |
| mir-550b  | 2   | mir-6887 | 2   |
| mir-551a  | 2   | mir-7    | 61  |
| mir-551b  | 36  | mir-708  | 127 |
| mir-5579  | 2   | mir-7108 | 2   |
| mir-5584  | 2   | mir-7158 | 1   |

|           |      |          |     |           |     |           |      |         |      |
|-----------|------|----------|-----|-----------|-----|-----------|------|---------|------|
| 450b      |      | 519c     |     | 520c      |     | 519d      |      | 95      |      |
| mir-452   | 340  | mir-519d | 9   | mir-520e  | 1   | mir-520g  | 10   | mir-96  | 80   |
| mir-4520b | 8    | mir-519e | 3   | mir-520f  | 1   | mir-521   | 2    | mir-98  | 118  |
| mir-4521  | 17   | mir-520a | 2   | mir-520g  | 18  | mir-524   | 2    | mir-99a | 3249 |
| mir-4524a | 1    | mir-520c | 4   | mir-521   | 2   | mir-532   | 580  | mir-99b | 106  |
| mir-454   | 1083 | mir-520f | 2   | mir-524   | 2   | mir-539   | 18   |         |      |
| mir-455   | 1355 | mir-520g | 24  | mir-525   | 3   | mir-542   | 28   |         |      |
| mir-4632  | 2    | mir-521  | 2   | mir-526b  | 6   | mir-543   | 17   |         |      |
| mir-4635  | 1    | mir-525  | 4   | mir-532   | 496 | mir-545   | 18   |         |      |
| mir-4638  | 1    | mir-526b | 2   | mir-539   | 3   | mir-548as | 2    |         |      |
| mir-4640  | 3    | mir-532  | 391 | mir-542   | 21  | mir-548b  | 5    |         |      |
| mir-4641  | 2    | mir-539  | 2   | mir-543   | 1   | mir-548e  | 4    |         |      |
| mir-4646  | 8    | mir-542  | 20  | mir-545   | 9   | mir-548f  | 2    |         |      |
| mir-4652  | 6    | mir-543  | 19  | mir-548a  | 4   | mir-548h  | 4    |         |      |
| mir-4654  | 1    | mir-544a | 4   | mir-548ah | 1   | mir-548q  | 4    |         |      |
| mir-4662a | 2    | mir-545  | 17  | mir-548aq | 2   | mir-551a  | 4    |         |      |
| mir-4664  | 2    | mir-548e | 1   | mir-548d  | 3   | mir-551b  | 12   |         |      |
| mir-4665  | 2    | mir-550a | 4   | mir-548e  | 1   | mir-5571  | 1    |         |      |
| mir-4666b | 4    | mir-551b | 34  | mir-548f  | 4   | mir-5579  | 2    |         |      |
| mir-4667  | 6    | mir-553  | 1   | mir-548q  | 1   | mir-561   | 1    |         |      |
| mir-4677  | 8    | mir-556  | 1   | mir-548x  | 1   | mir-574   | 1037 |         |      |
| mir-4690  | 28   | mir-5584 | 2   | mir-550a  | 6   | mir-576   | 4    |         |      |

|           |    |
|-----------|----|
| 4632      |    |
| mir-4635  | 1  |
| mir-4645  | 4  |
| mir-4652  | 2  |
| mir-4655  | 1  |
| mir-4659a | 1  |
| mir-4661  | 1  |
| mir-4665  | 2  |
| mir-4666a | 1  |
| mir-4667  | 3  |
| mir-4668  | 10 |
| mir-4670  | 2  |
| mir-4676  | 4  |
| mir-4677  | 2  |
| mir-4680  | 8  |
| mir-4685  | 1  |
| mir-4687  | 2  |
| mir-4689  | 2  |
| mir-4700  | 10 |
| mir-4701  | 1  |
| mir-4705  | 1  |
| mir-4707  | 1  |

|           |     |          |      |
|-----------|-----|----------|------|
| mir-5585  | 24  | mir-744  | 131  |
| mir-5586  | 1   | mir-761  | 2    |
| mir-5588  | 1   | mir-766  | 12   |
| mir-561   | 4   | mir-769  | 32   |
| mir-5681a | 1   | mir-7845 | 2    |
| mir-570   | 2   | mir-7852 | 2    |
| mir-574   | 680 | mir-874  | 46   |
| mir-576   | 13  | mir-877  | 8    |
| mir-579   | 4   | mir-885  | 2    |
| mir-582   | 49  | mir-887  | 8    |
| mir-584   | 2   | mir-92a  | 364  |
| mir-585   | 4   | mir-92b  | 102  |
| mir-589   | 6   | mir-93   | 2353 |
| mir-590   | 112 | mir-939  | 1    |
| mir-598   | 10  | mir-940  | 17   |
| mir-6068  | 1   | mir-942  | 2    |
| mir-6079  | 1   | mir-95   | 10   |
| mir-6084  | 2   | mir-96   | 72   |
| mir-615   | 2   | mir-98   | 53   |
| mir-616   | 2   | mir-99a  | 2824 |
| mir-619   | 2   | mir-99b  | 355  |
| mir-      | 49  |          |      |

|          |    |          |     |          |     |          |     |
|----------|----|----------|-----|----------|-----|----------|-----|
| mir-4700 | 1  | mir-5585 | 6   | mir-551a | 4   | mir-579  | 2   |
| mir-4707 | 52 | mir-574  | 864 | mir-551b | 71  | mir-582  | 6   |
| mir-4708 | 1  | mir-576  | 9   | mir-561  | 1   | mir-584  | 2   |
| mir-4713 | 3  | mir-579  | 8   | mir-570  | 4   | mir-585  | 2   |
| mir-4714 | 5  | mir-582  | 16  | mir-574  | 512 | mir-589  | 4   |
| mir-4715 | 2  | mir-584  | 2   | mir-576  | 13  | mir-590  | 207 |
| mir-4723 | 6  | mir-585  | 2   | mir-579  | 10  | mir-598  | 1   |
| mir-4725 | 1  | mir-589  | 8   | mir-582  | 34  | mir-610  | 2   |
| mir-4726 | 2  | mir-590  | 299 | mir-584  | 4   | mir-615  | 2   |
| mir-4728 | 18 | mir-605  | 2   | mir-589  | 14  | mir-616  | 4   |
| mir-4731 | 2  | mir-6079 | 1   | mir-590  | 654 | mir-619  | 18  |
| mir-4741 | 1  | mir-6127 | 1   | mir-598  | 12  | mir-624  | 8   |
| mir-4742 | 4  | mir-615  | 24  | mir-6079 | 1   | mir-625  | 51  |
| mir-4745 | 2  | mir-616  | 4   | mir-615  | 5   | mir-627  | 3   |
| mir-4746 | 3  | mir-619  | 2   | mir-616  | 5   | mir-628  | 6   |
| mir-4747 | 2  | mir-624  | 4   | mir-619  | 3   | mir-629  | 3   |
| mir-4750 | 2  | mir-625  | 83  | mir-624  | 4   | mir-642a | 7   |
| mir-4753 | 1  | mir-627  | 2   | mir-625  | 128 | mir-6499 | 2   |
| mir-4757 | 1  | mir-628  | 10  | mir-627  | 18  | mir-6501 | 1   |
| mir-4760 | 4  | mir-629  | 4   | mir-628  | 5   | mir-6503 | 22  |
| mir-4761 | 2  | mir-642a | 8   | mir-629  | 10  | mir-6504 | 1   |
| mir-     | 1  | mir-     | 2   | mir-     | 5   | mir-     | 2   |

|          |    |
|----------|----|
| mir-4708 | 16 |
| mir-4709 | 1  |
| mir-4713 | 4  |
| mir-4714 | 2  |
| mir-4716 | 1  |
| mir-4722 | 2  |
| mir-4725 | 2  |
| mir-4726 | 1  |
| mir-4735 | 1  |
| mir-4742 | 2  |
| mir-4745 | 3  |
| mir-4746 | 2  |
| mir-4747 | 2  |
| mir-4750 | 2  |
| mir-4753 | 2  |
| mir-4756 | 1  |
| mir-4758 | 2  |
| mir-4762 | 2  |
| mir-4763 | 1  |
| mir-4768 | 1  |
| mir-4777 | 2  |
| mir-     | 6  |

|           |     |
|-----------|-----|
| 625       |     |
| mir-627   | 9   |
| mir-628   | 18  |
| mir-629   | 5   |
| mir-642b  | 5   |
| mir-6499  | 2   |
| mir-6500  | 1   |
| mir-6502  | 2   |
| mir-6503  | 3   |
| mir-6506  | 2   |
| mir-6511b | 2   |
| mir-6516  | 3   |
| mir-652   | 23  |
| mir-654   | 15  |
| mir-655   | 6   |
| mir-656   | 16  |
| mir-659   | 1   |
| mir-660   | 105 |
| mir-664a  | 48  |
| mir-664b  | 6   |
| mir-668   | 1   |
| mir-671   | 37  |

|          |      |           |    |          |     |          |     |
|----------|------|-----------|----|----------|-----|----------|-----|
| 4762     |      | 6503      |    | 642a     |     | 6505     |     |
| mir-4772 | 7    | mir-651   | 2  | mir-6502 | 1   | mir-6512 | 2   |
| mir-4777 | 1    | mir-6513  | 2  | mir-6503 | 3   | mir-6514 | 2   |
| mir-4778 | 33   | mir-652   | 77 | mir-6510 | 2   | mir-652  | 172 |
| mir-4781 | 1    | mir-654   | 36 | mir-6514 | 2   | mir-654  | 77  |
| mir-4783 | 49   | mir-655   | 12 | mir-652  | 186 | mir-655  | 18  |
| mir-4787 | 2    | mir-656   | 8  | mir-654  | 9   | mir-656  | 15  |
| mir-4794 | 2    | mir-659   | 3  | mir-655  | 6   | mir-660  | 237 |
| mir-4798 | 2    | mir-660   | 63 | mir-656  | 4   | mir-664a | 36  |
| mir-4802 | 2    | mir-664a  | 18 | mir-659  | 3   | mir-664b | 8   |
| mir-4804 | 1    | mir-664b  | 8  | mir-660  | 111 | mir-665  | 9   |
| mir-483  | 22   | mir-665   | 2  | mir-664a | 69  | mir-668  | 1   |
| mir-484  | 4877 | mir-671   | 75 | mir-664b | 8   | mir-671  | 76  |
| mir-485  | 14   | mir-6715a | 1  | mir-665  | 1   | mir-6716 | 4   |
| mir-486  | 91   | mir-6715b | 1  | mir-671  | 141 | mir-6720 | 2   |
| mir-487a | 22   | mir-6716  | 9  | mir-6716 | 1   | mir-6721 | 2   |
| mir-487b | 208  | mir-6721  | 2  | mir-6720 | 6   | mir-6726 | 2   |
| mir-489  | 41   | mir-6722  | 6  | mir-6723 | 1   | mir-6727 | 1   |
| mir-491  | 10   | mir-6729  | 6  | mir-6726 | 3   | mir-6731 | 2   |
| mir-493  | 45   | mir-6732  | 4  | mir-6734 | 1   | mir-6734 | 2   |
| mir-494  | 46   | mir-6743  | 3  | mir-6740 | 2   | mir-6737 | 2   |
| mir-495  | 54   | mir-6746  | 2  | mir-6747 | 2   | mir-6745 | 1   |

|          |     |
|----------|-----|
| 4778     |     |
| mir-4783 | 1   |
| mir-4786 | 8   |
| mir-4787 | 2   |
| mir-4789 | 1   |
| mir-4793 | 2   |
| mir-4796 | 6   |
| mir-4800 | 1   |
| mir-4804 | 1   |
| mir-483  | 25  |
| mir-484  | 239 |
| mir-485  | 5   |
| mir-486  | 4   |
| mir-487a | 6   |
| mir-487b | 42  |
| mir-489  | 4   |
| mir-490  | 1   |
| mir-491  | 4   |
| mir-492  | 9   |
| mir-494  | 2   |
| mir-495  | 12  |
| mir-497  | 61  |

|           |    |
|-----------|----|
| mir-6716  | 1  |
| mir-6721  | 2  |
| mir-6722  | 2  |
| mir-6723  | 1  |
| mir-6731  | 2  |
| mir-6734  | 2  |
| mir-6743  | 7  |
| mir-6749  | 47 |
| mir-675   | 7  |
| mir-6750  | 2  |
| mir-6753  | 1  |
| mir-6755  | 2  |
| mir-676   | 2  |
| mir-6766  | 2  |
| mir-6771  | 2  |
| mir-6779  | 2  |
| mir-6780b | 2  |
| mir-6783  | 1  |
| mir-6786  | 1  |
| mir-6791  | 1  |
| mir-6793  | 2  |
| mir-      | 2  |

|          |      |          |    |           |   |           |    |
|----------|------|----------|----|-----------|---|-----------|----|
| mir-497  | 106  | mir-6749 | 22 | mir-675   | 5 | mir-675   | 21 |
| mir-499a | 5    | mir-675  | 3  | mir-6752  | 2 | mir-6751  | 1  |
| mir-5000 | 1    | mir-676  | 1  | mir-6756  | 2 | mir-6752  | 4  |
| mir-5001 | 2    | mir-6766 | 2  | mir-6759  | 1 | mir-6755  | 2  |
| mir-5006 | 2    | mir-6768 | 3  | mir-6767  | 2 | mir-6756  | 2  |
| mir-5008 | 3    | mir-6779 | 3  | mir-6769b | 2 | mir-6762  | 1  |
| mir-500a | 82   | mir-6781 | 4  | mir-6773  | 1 | mir-6769b | 4  |
| mir-500b | 2    | mir-6782 | 3  | mir-6777  | 2 | mir-6779  | 1  |
| mir-501  | 18   | mir-6784 | 1  | mir-6779  | 2 | mir-6782  | 3  |
| mir-5011 | 2    | mir-6791 | 2  | mir-6791  | 5 | mir-6791  | 2  |
| mir-502  | 92   | mir-6793 | 4  | mir-6796  | 1 | mir-6793  | 2  |
| mir-503  | 106  | mir-6795 | 1  | mir-6797  | 2 | mir-6796  | 8  |
| mir-504  | 1    | mir-6802 | 2  | mir-6803  | 6 | mir-6803  | 4  |
| mir-505  | 1119 | mir-6803 | 10 | mir-6807  | 2 | mir-6810  | 2  |
| mir-5095 | 1    | mir-6804 | 1  | mir-6813  | 2 | mir-6814  | 2  |
| mir-5100 | 79   | mir-6805 | 1  | mir-6822  | 1 | mir-6815  | 1  |
| mir-512  | 14   | mir-6806 | 2  | mir-6826  | 2 | mir-6822  | 2  |
| mir-513c | 2    | mir-6810 | 2  | mir-6830  | 6 | mir-6830  | 9  |
| mir-514b | 2    | mir-6812 | 4  | mir-6835  | 1 | mir-6838  | 2  |
| mir-515  | 10   | mir-6820 | 4  | mir-6838  | 1 | mir-6850  | 1  |
| mir-517a | 16   | mir-6821 | 1  | mir-6845  | 6 | mir-6855  | 2  |
| mir-     | 36   | mir-     | 8  | mir-      | 1 | mir-      | 3  |

|          |     |
|----------|-----|
| mir-499a | 4   |
| mir-5001 | 16  |
| mir-5008 | 7   |
| mir-5009 | 1   |
| mir-500a | 7   |
| mir-501  | 1   |
| mir-5010 | 3   |
| mir-502  | 20  |
| mir-503  | 8   |
| mir-504  | 8   |
| mir-5047 | 2   |
| mir-505  | 82  |
| mir-508  | 1   |
| mir-5088 | 8   |
| mir-5095 | 9   |
| mir-510  | 2   |
| mir-5100 | 6   |
| mir-512  | 26  |
| mir-514b | 7   |
| mir-515  | 36  |
| mir-517a | 74  |
| mir-     | 199 |

|          |     |
|----------|-----|
| 6798     |     |
| mir-6800 | 1   |
| mir-6802 | 1   |
| mir-6812 | 10  |
| mir-6815 | 4   |
| mir-6824 | 1   |
| mir-6825 | 1   |
| mir-6841 | 1   |
| mir-6844 | 1   |
| mir-6855 | 6   |
| mir-6857 | 2   |
| mir-6865 | 3   |
| mir-6877 | 2   |
| mir-6880 | 2   |
| mir-6887 | 4   |
| mir-6895 | 1   |
| mir-7    | 73  |
| mir-708  | 681 |
| mir-7110 | 3   |
| mir-7157 | 2   |
| mir-744  | 33  |
| mir-766  | 18  |

|          |      |          |     |          |      |          |      |
|----------|------|----------|-----|----------|------|----------|------|
| 517b     |      | 6833     |     | 6850     |      | 6858     |      |
| mir-517c | 8    | mir-6848 | 1   | mir-6851 | 2    | mir-6870 | 2    |
| mir-5187 | 8    | mir-6849 | 2   | mir-6854 | 8    | mir-6872 | 3    |
| mir-518c | 26   | mir-6851 | 2   | mir-6855 | 2    | mir-6875 | 2    |
| mir-518e | 4    | mir-6852 | 1   | mir-6856 | 1    | mir-6878 | 1    |
| mir-519a | 8    | mir-6854 | 6   | mir-6858 | 4    | mir-7    | 58   |
| mir-519b | 8    | mir-6879 | 2   | mir-6861 | 8    | mir-708  | 479  |
| mir-519c | 2    | mir-6887 | 10  | mir-6870 | 2    | mir-7109 | 4    |
| mir-519d | 84   | mir-6889 | 2   | mir-6879 | 4    | mir-7111 | 2    |
| mir-519e | 8    | mir-7    | 118 | mir-6885 | 2    | mir-744  | 64   |
| mir-520a | 2    | mir-708  | 590 | mir-6886 | 1    | mir-758  | 2    |
| mir-520c | 10   | mir-7106 | 4   | mir-6887 | 10   | mir-761  | 2    |
| mir-520e | 2    | mir-7107 | 2   | mir-6890 | 1    | mir-766  | 43   |
| mir-520f | 5    | mir-7111 | 2   | mir-7    | 140  | mir-767  | 2    |
| mir-520g | 6    | mir-7152 | 1   | mir-708  | 1310 | mir-769  | 32   |
| mir-521  | 14   | mir-744  | 36  | mir-7106 | 2    | mir-874  | 151  |
| mir-524  | 2    | mir-758  | 4   | mir-7108 | 4    | mir-877  | 7    |
| mir-525  | 12   | mir-766  | 23  | mir-7111 | 8    | mir-887  | 51   |
| mir-532  | 6209 | mir-769  | 22  | mir-744  | 156  | mir-9    | 2    |
| mir-539  | 2    | mir-7845 | 3   | mir-766  | 22   | mir-92a  | 670  |
| mir-542  | 97   | mir-7854 | 4   | mir-767  | 41   | mir-92b  | 91   |
| mir-543  | 29   | mir-873  | 8   | mir-769  | 34   | mir-93   | 1053 |

|          |     |
|----------|-----|
| 517b     |     |
| mir-517c | 41  |
| mir-5189 | 2   |
| mir-518a | 2   |
| mir-518c | 51  |
| mir-518d | 1   |
| mir-518e | 19  |
| mir-5195 | 1   |
| mir-5196 | 2   |
| mir-519a | 4   |
| mir-519b | 4   |
| mir-519d | 103 |
| mir-519e | 11  |
| mir-520a | 3   |
| mir-520c | 1   |
| mir-520d | 4   |
| mir-520f | 4   |
| mir-520g | 18  |
| mir-521  | 18  |
| mir-522  | 13  |
| mir-523  | 8   |
| mir-524  | 13  |

|          |      |
|----------|------|
| mir-767  | 4    |
| mir-769  | 6    |
| mir-7847 | 2    |
| mir-874  | 45   |
| mir-877  | 8    |
| mir-885  | 2    |
| mir-887  | 3    |
| mir-889  | 4    |
| mir-92a  | 282  |
| mir-92b  | 41   |
| mir-93   | 1234 |
| mir-938  | 1    |
| mir-940  | 8    |
| mir-95   | 18   |
| mir-96   | 62   |
| mir-98   | 143  |
| mir-99a  | 2758 |
| mir-99b  | 181  |

|           |     |         |      |         |      |         |      |
|-----------|-----|---------|------|---------|------|---------|------|
| mir-545   | 74  | mir-874 | 45   | mir-874 | 25   | mir-940 | 39   |
| mir-548a  | 14  | mir-876 | 6    | mir-877 | 9    | mir-95  | 16   |
| mir-548ah | 3   | mir-877 | 18   | mir-887 | 17   | mir-96  | 16   |
| mir-548ao | 8   | mir-887 | 10   | mir-9   | 2    | mir-98  | 72   |
| mir-548ap | 2   | mir-889 | 6    | mir-92a | 4207 | mir-99a | 8079 |
| mir-548aq | 6   | mir-92a | 1016 | mir-92b | 212  | mir-99b | 460  |
| mir-548ar | 2   | mir-92b | 97   | mir-93  | 4597 |         |      |
| mir-548at | 1   | mir-93  | 2737 | mir-940 | 54   |         |      |
| mir-548ay | 1   | mir-940 | 20   | mir-942 | 1    |         |      |
| mir-548b  | 4   | mir-95  | 72   | mir-95  | 67   |         |      |
| mir-548ba | 2   | mir-96  | 64   | mir-96  | 196  |         |      |
| mir-548d  | 8   | mir-98  | 243  | mir-98  | 424  |         |      |
| mir-548e  | 4   | mir-99a | 1443 | mir-99a | 4487 |         |      |
| mir-548h  | 6   | mir-99b | 278  | mir-99b | 268  |         |      |
| mir-548o  | 14  |         |      |         |      |         |      |
| mir-548q  | 7   |         |      |         |      |         |      |
| mir-548t  | 26  |         |      |         |      |         |      |
| mir-548x  | 3   |         |      |         |      |         |      |
| mir-550a  | 60  |         |      |         |      |         |      |
| mir-551a  | 217 |         |      |         |      |         |      |
| mir-551b  | 129 |         |      |         |      |         |      |
| mir-552   | 2   |         |      |         |      |         |      |

|           |     |
|-----------|-----|
| mir-525   | 16  |
| mir-532   | 337 |
| mir-539   | 6   |
| mir-542   | 44  |
| mir-543   | 7   |
| mir-544a  | 2   |
| mir-545   | 27  |
| mir-548aq | 4   |
| mir-548at | 2   |
| mir-548b  | 4   |
| mir-548d  | 3   |
| mir-548e  | 2   |
| mir-548f  | 2   |
| mir-548o  | 2   |
| mir-548q  | 6   |
| mir-548t  | 4   |
| mir-550a  | 10  |
| mir-551a  | 10  |
| mir-551b  | 13  |
| mir-553   | 1   |
| mir-556   | 3   |
| mir-      | 2   |

|          |      |
|----------|------|
|          |      |
| mir-556  | 2    |
| mir-5571 | 1    |
| mir-5579 | 2    |
| mir-5581 | 4    |
| mir-5582 | 2    |
| mir-5583 | 2    |
| mir-5585 | 8    |
| mir-5586 | 3    |
| mir-5588 | 6    |
| mir-5591 | 8    |
| mir-561  | 11   |
| mir-5699 | 30   |
| mir-570  | 4    |
| mir-574  | 3191 |
| mir-576  | 48   |
| mir-5787 | 2    |
| mir-579  | 18   |
| mir-581  | 1    |
| mir-582  | 27   |
| mir-584  | 18   |
| mir-585  | 23   |

|          |     |
|----------|-----|
| 5579     |     |
| mir-5582 | 3   |
| mir-5585 | 24  |
| mir-5590 | 2   |
| mir-561  | 9   |
| mir-5684 | 2   |
| mir-5697 | 2   |
| mir-5699 | 4   |
| mir-570  | 6   |
| mir-571  | 1   |
| mir-574  | 401 |
| mir-576  | 6   |
| mir-5787 | 4   |
| mir-579  | 6   |
| mir-582  | 33  |
| mir-584  | 2   |
| mir-589  | 2   |
| mir-590  | 315 |
| mir-591  | 1   |
| mir-593  | 1   |
| mir-598  | 6   |
| mir-6079 | 1   |

|          |      |
|----------|------|
| mir-589  | 20   |
| mir-590  | 3553 |
| mir-597  | 8    |
| mir-598  | 389  |
| mir-603  | 3    |
| mir-610  | 1    |
| mir-615  | 272  |
| mir-616  | 26   |
| mir-619  | 22   |
| mir-624  | 14   |
| mir-625  | 1396 |
| mir-627  | 45   |
| mir-628  | 11   |
| mir-629  | 65   |
| mir-642a | 11   |
| mir-6500 | 16   |
| mir-6501 | 1    |
| mir-6503 | 28   |
| mir-6505 | 3    |
| mir-6508 | 2    |
| mir-6509 | 4    |
| mir-651  | 7    |

|           |     |
|-----------|-----|
| mir-615   | 4   |
| mir-616   | 4   |
| mir-619   | 102 |
| mir-624   | 4   |
| mir-625   | 41  |
| mir-627   | 21  |
| mir-628   | 4   |
| mir-629   | 11  |
| mir-642a  | 1   |
| mir-642b  | 2   |
| mir-6499  | 1   |
| mir-6500  | 1   |
| mir-6502  | 1   |
| mir-6503  | 2   |
| mir-6504  | 2   |
| mir-6505  | 4   |
| mir-6506  | 2   |
| mir-6507  | 1   |
| mir-651   | 4   |
| mir-6510  | 9   |
| mir-6511a | 2   |
| mir-      | 3   |

|           |      |
|-----------|------|
|           |      |
| mir-6511b | 8    |
| mir-6512  | 1    |
| mir-6514  | 10   |
| mir-6515  | 14   |
| mir-6516  | 1    |
| mir-652   | 4759 |
| mir-654   | 68   |
| mir-655   | 20   |
| mir-656   | 4    |
| mir-660   | 398  |
| mir-663b  | 2    |
| mir-664a  | 253  |
| mir-664b  | 40   |
| mir-665   | 17   |
| mir-668   | 3    |
| mir-670   | 1    |
| mir-671   | 545  |
| mir-6723  | 10   |
| mir-6726  | 2    |
| mir-6730  | 1    |
| mir-6731  | 6    |

|          |     |
|----------|-----|
| 6512     |     |
| mir-6516 | 8   |
| mir-652  | 79  |
| mir-654  | 1   |
| mir-655  | 5   |
| mir-656  | 2   |
| mir-657  | 2   |
| mir-659  | 1   |
| mir-660  | 127 |
| mir-663b | 8   |
| mir-664a | 26  |
| mir-664b | 7   |
| mir-665  | 3   |
| mir-668  | 2   |
| mir-671  | 59  |
| mir-6722 | 2   |
| mir-6727 | 1   |
| mir-6728 | 2   |
| mir-6732 | 4   |
| mir-6733 | 1   |
| mir-6734 | 4   |
| mir-6735 | 4   |

|          |   |
|----------|---|
| mir-6732 | 1 |
| mir-6734 | 8 |
| mir-6735 | 2 |
| mir-6737 | 2 |
| mir-6742 | 4 |
| mir-6743 | 2 |
| mir-6745 | 1 |
| mir-6747 | 4 |
| mir-6749 | 4 |
| mir-675  | 4 |
| mir-6750 | 2 |
| mir-6752 | 2 |
| mir-6754 | 3 |
| mir-6756 | 6 |
| mir-6757 | 2 |
| mir-6758 | 2 |
| mir-6761 | 2 |
| mir-6763 | 9 |
| mir-6764 | 4 |
| mir-6766 | 1 |
| mir-6767 | 3 |
| mir-     | 1 |

|          |    |
|----------|----|
| mir-6739 | 2  |
| mir-6740 | 1  |
| mir-6741 | 8  |
| mir-6742 | 2  |
| mir-6743 | 2  |
| mir-6746 | 2  |
| mir-6747 | 1  |
| mir-6748 | 2  |
| mir-6749 | 10 |
| mir-675  | 4  |
| mir-6750 | 2  |
| mir-6751 | 10 |
| mir-6752 | 2  |
| mir-6754 | 2  |
| mir-6755 | 2  |
| mir-6756 | 4  |
| mir-6757 | 2  |
| mir-6759 | 4  |
| mir-6762 | 1  |
| mir-6765 | 4  |
| mir-6766 | 1  |
| mir-     | 2  |

|           |     |
|-----------|-----|
| 6768      |     |
| mir-6769b | 14  |
| mir-6772  | 1   |
| mir-6773  | 1   |
| mir-6774  | 4   |
| mir-6777  | 4   |
| mir-6779  | 2   |
| mir-6780b | 2   |
| mir-6783  | 3   |
| mir-6789  | 8   |
| mir-6791  | 213 |
| mir-6793  | 5   |
| mir-6795  | 2   |
| mir-6796  | 4   |
| mir-6797  | 19  |
| mir-6798  | 1   |
| mir-6799  | 2   |
| mir-6801  | 5   |
| mir-6802  | 2   |
| mir-6803  | 18  |
| mir-6804  | 2   |
| mir-6805  | 2   |

|           |    |
|-----------|----|
| 6767      |    |
| mir-6769a | 4  |
| mir-6769b | 6  |
| mir-6771  | 3  |
| mir-6772  | 2  |
| mir-6773  | 1  |
| mir-6774  | 6  |
| mir-6775  | 4  |
| mir-6777  | 1  |
| mir-6779  | 4  |
| mir-6780a | 3  |
| mir-6780b | 3  |
| mir-6781  | 2  |
| mir-6783  | 6  |
| mir-6784  | 1  |
| mir-6786  | 2  |
| mir-6788  | 2  |
| mir-6789  | 2  |
| mir-6790  | 4  |
| mir-6791  | 41 |
| mir-6793  | 4  |
| mir-6794  | 1  |

|          |   |
|----------|---|
| mir-6806 | 2 |
| mir-6809 | 2 |
| mir-6810 | 8 |
| mir-6812 | 6 |
| mir-6813 | 2 |
| mir-6815 | 4 |
| mir-6816 | 1 |
| mir-6818 | 2 |
| mir-6819 | 2 |
| mir-6820 | 2 |
| mir-6822 | 2 |
| mir-6824 | 4 |
| mir-6825 | 6 |
| mir-6827 | 2 |
| mir-6829 | 1 |
| mir-6830 | 4 |
| mir-6831 | 2 |
| mir-6835 | 1 |
| mir-6836 | 4 |
| mir-6837 | 2 |
| mir-6839 | 6 |
| mir-     | 3 |

|          |    |
|----------|----|
| mir-6795 | 16 |
| mir-6796 | 2  |
| mir-6797 | 3  |
| mir-6798 | 2  |
| mir-6801 | 2  |
| mir-6803 | 3  |
| mir-6806 | 1  |
| mir-6807 | 2  |
| mir-6808 | 1  |
| mir-6809 | 12 |
| mir-6810 | 2  |
| mir-6811 | 2  |
| mir-6812 | 7  |
| mir-6816 | 2  |
| mir-6818 | 2  |
| mir-6821 | 4  |
| mir-6822 | 3  |
| mir-6825 | 12 |
| mir-6830 | 5  |
| mir-6831 | 4  |
| mir-6832 | 2  |
| mir-     | 4  |

|          |    |
|----------|----|
| 6846     |    |
| mir-6847 | 3  |
| mir-6848 | 1  |
| mir-6850 | 7  |
| mir-6851 | 3  |
| mir-6854 | 4  |
| mir-6855 | 4  |
| mir-6856 | 2  |
| mir-6858 | 8  |
| mir-6866 | 4  |
| mir-6867 | 2  |
| mir-6869 | 1  |
| mir-6870 | 2  |
| mir-6873 | 2  |
| mir-6879 | 2  |
| mir-6880 | 14 |
| mir-6882 | 1  |
| mir-6883 | 4  |
| mir-6884 | 1  |
| mir-6886 | 8  |
| mir-6887 | 38 |
| mir-6890 | 2  |

|          |   |
|----------|---|
| 6833     |   |
| mir-6834 | 1 |
| mir-6835 | 1 |
| mir-6836 | 4 |
| mir-6838 | 7 |
| mir-6839 | 2 |
| mir-6840 | 3 |
| mir-6842 | 2 |
| mir-6846 | 5 |
| mir-6848 | 1 |
| mir-6849 | 4 |
| mir-6850 | 8 |
| mir-6851 | 3 |
| mir-6852 | 2 |
| mir-6857 | 1 |
| mir-6858 | 3 |
| mir-6862 | 2 |
| mir-6864 | 1 |
| mir-6866 | 8 |
| mir-6867 | 2 |
| mir-6869 | 2 |
| mir-6870 | 2 |

|          |      |
|----------|------|
| mir-6895 | 2    |
| mir-7    | 1343 |
| mir-708  | 3843 |
| mir-7106 | 2    |
| mir-7108 | 6    |
| mir-7110 | 4    |
| mir-7111 | 10   |
| mir-7112 | 2    |
| mir-7152 | 3    |
| mir-744  | 315  |
| mir-758  | 8    |
| mir-759  | 2    |
| mir-766  | 171  |
| mir-767  | 4    |
| mir-769  | 406  |
| mir-7843 | 4    |
| mir-7844 | 1    |
| mir-7847 | 2    |
| mir-7851 | 2    |
| mir-7854 | 1    |
| mir-7855 | 2    |
| mir-802  | 5    |

|          |     |
|----------|-----|
| mir-6873 | 8   |
| mir-6875 | 1   |
| mir-6876 | 2   |
| mir-6878 | 1   |
| mir-6879 | 3   |
| mir-6880 | 2   |
| mir-6882 | 1   |
| mir-6884 | 4   |
| mir-6886 | 2   |
| mir-6887 | 4   |
| mir-6889 | 1   |
| mir-6891 | 1   |
| mir-6893 | 4   |
| mir-6894 | 4   |
| mir-7    | 59  |
| mir-708  | 488 |
| mir-7106 | 8   |
| mir-7107 | 10  |
| mir-7108 | 2   |
| mir-7109 | 3   |
| mir-711  | 2   |
| mir-7110 | 1   |

|         |            |
|---------|------------|
| mir-873 | 7          |
| mir-874 | 103        |
| mir-876 | 2          |
| mir-877 | 58         |
| mir-885 | 48         |
| mir-887 | 32         |
| mir-889 | 8          |
| mir-9   | 136        |
| mir-92a | 2100       |
| mir-92b | 800        |
| mir-93  | 12477      |
| mir-939 | 6          |
| mir-940 | 294        |
| mir-942 | 15         |
| mir-95  | 584        |
| mir-96  | 2219       |
| mir-98  | 1847       |
| mir-99a | 19652<br>2 |
| mir-99b | 1604       |

|          |    |
|----------|----|
| mir-7111 | 4  |
| mir-7113 | 5  |
| mir-7114 | 1  |
| mir-7156 | 2  |
| mir-7160 | 2  |
| mir-744  | 30 |
| mir-766  | 2  |
| mir-769  | 20 |
| mir-770  | 2  |
| mir-7843 | 3  |
| mir-7846 | 1  |
| mir-7847 | 3  |
| mir-7848 | 1  |
| mir-7850 | 1  |
| mir-7851 | 5  |
| mir-873  | 3  |
| mir-874  | 23 |
| mir-876  | 4  |
| mir-877  | 10 |
| mir-885  | 1  |
| mir-887  | 3  |
| mir-     | 1  |

|          |      |
|----------|------|
| 888      |      |
| mir-889  | 2    |
| mir-891a | 2    |
| mir-9    | 2    |
| mir-921  | 4    |
| mir-92a  | 239  |
| mir-92b  | 19   |
| mir-93   | 1028 |
| mir-939  | 3    |
| mir-940  | 17   |
| mir-942  | 1    |
| mir-95   | 14   |
| mir-96   | 219  |
| mir-98   | 612  |
| mir-99a  | 2621 |
| mir-99b  | 196  |
