# Supplementary material for: Small RNAs in metastatic and non-metastatic oral squamous cell carcinoma
Source: PubMed Central journal article supplement (PMC4479233; doi:10.1186/s12920-015-0102-4), 2015-06-24
Supplement: 12920_2015_102_MOESM8_ESM.pdf [file 12920_2015_102_MOESM8_ESM.pdf]

**Additional File 8:**

| QryName                                  | IDncRN Adb | SbjName           | SbjHeader                                                         | Database        | Type                 | E value | Qry Cov | Sbj Cov | Identity |
|------------------------------------------|------------|-------------------|-------------------------------------------------------------------|-----------------|----------------------|---------|---------|---------|----------|
| 10074 chromosome 19: 24185867 - 24185902 | 13210173   | IDncRNAdb13210173 | >FR0314379 Putative conserved noncoding region (RNAz) Hsapiens    | fRNAdb_v3.4     | Ab initio prediction | 1.4e-12 | 100     | 22      | 100      |
|                                          | 8447736    | IDncRNAdb8447736  | >gnl Rnaz RNZ17242 159                                            | RNAdb_ALL.fasta | Ab initio prediction | 1.4e-12 | 100     | 22      | 100      |
| 10396 chromosome 2: 25454991 - 25455026  | 13201097   | IDncRNAdb13201097 | >FR0284974 Putative conserved noncoding region (RNAz) Hsapiens    | fRNAdb_v3.4     | Ab initio prediction | 1.7e-12 | 100     | 8       | 100      |
|                                          | 8448572    | IDncRNAdb8448572  | >gnl Rnaz RNZ18002 446                                            | RNAdb_ALL.fasta | Ab initio prediction | 1.7e-12 | 100     | 8       | 100      |
| 10567 chromosome 1: 26253801 - 26253836  | 13182208   | IDncRNAdb13182208 | >FR0223937 Putative conserved noncoding region (RNAz) Hsapiens    | fRNAdb_v3.4     | Ab initio prediction | 1.4e-12 | 100     | 21      | 100      |
|                                          | 8444103    | IDncRNAdb8444103  | >gnl Rnaz RNZ1394 167                                             | RNAdb_ALL.fasta | Ab initio prediction | 1.4e-12 | 100     | 21      | 100      |
| 10872 chromosome 1: 27929061 - 27929096  | 13138018   | IDncRNAdb13138018 | >FR0081001 Putative conserved noncoding region (RNAz) Hsapiens    | fRNAdb_v3.4     | Ab initio prediction | 1.7e-12 | 100     | 5       | 100      |
|                                          | 8445126    | IDncRNAdb8445126  | >gnl Rnaz RNZ1487 707                                             | RNAdb_ALL.fasta | Ab initio prediction | 1.7e-12 | 100     | 5       | 100      |
| 10983 chromosome 3: 2843082 - 2843117    | 13223817   | IDncRNAdb13223817 | >FR0358037 Putative conserved noncoding region (RNAz) Hsapiens    | fRNAdb_v3.4     | Ab initio prediction | 1.4e-12 | 100     | 22      | 100      |
|                                          | 8453348    | IDncRNAdb8453348  | >gnl Rnaz RNZ22344 160                                            | RNAdb_ALL.fasta | Ab initio prediction | 1.4e-12 | 100     | 22      | 100      |
| 11420 chromosome 19: 30832066 - 30832101 | 13215641   | IDncRNAdb13215641 | >FR0332043 Putative conserved noncoding region (RNAz) Hsapiens    | fRNAdb_v3.4     | Ab initio prediction | 1.4e-12 | 100     | 22      | 100      |
|                                          | 8447767    | IDncRNAdb8447767  | >gnl Rnaz RNZ17270 160                                            | RNAdb_ALL.fasta | Ab initio prediction | 1.4e-12 | 100     | 22      | 100      |
| 11425 chromosome 19: 30860748 - 30860783 | 13204761   | IDncRNAdb13204761 | >FR0296744 Putative conserved noncoding region (RNAz) Hsapiens    | fRNAdb_v3.4     | Ab initio prediction | 1.3e-12 | 100     | 30      | 100      |
|                                          | 8447770    | IDncRNAdb8447770  | >gnl Rnaz RNZ17273 120                                            | RNAdb_ALL.fasta | Ab initio prediction | 1.3e-12 | 100     | 30      | 100      |
| 11881 chromosome 6: 33175618 - 33175653  | 13115906   | IDncRNAdb13115906 | >FR0009883 Putative conserved noncoding region (EvoFold) Hsapiens | fRNAdb_v3.4     | Ab initio prediction | 1.0e-12 | 100     | 41      | 100      |
|                                          | 8190499    | IDncRNAdb8190499  | >gnl evofold EVF19085 87                                          | RNAdb_ALL.fasta | Ab initio prediction | 1.0e-12 | 100     | 41      | 100      |
| 11923 chromosome 6: 33419940 - 33419975  | 13118727   | IDncRNAdb13118727 | >FR0018877 Putative conserved noncoding region (RNAz) Hsapiens    | fRNAdb_v3.4     | Ab initio prediction | 1.8e-12 | 100     | 4       | 100      |
|                                          | 8460741    | IDncRNAdb8460741  | >gnl Rnaz RNZ29065 782                                            | RNAdb_ALL.fasta | Ab initio prediction | 1.8e-12 | 100     | 4       | 100      |
| 12006 chromosome 17: 33884684 - 33884719 | 13125269   | IDncRNAdb13125269 | >FR0039648 Putative conserved noncoding region (RNAz) Hsapiens    | fRNAdb_v3.4     | Ab initio prediction | 1.6e-12 | 100     | 15      | 100      |

|                                             |          |                       |                                                                      |                 |                         |         |     |    |     |
|---------------------------------------------|----------|-----------------------|----------------------------------------------------------------------|-----------------|-------------------------|---------|-----|----|-----|
|                                             | 8445415  | IDncRNAdb844<br>5415  | >gnl Rnaz RNZ15132 240                                               | RNAdb_ALL.fasta | Ab initio<br>prediction | 1.6e-12 | 100 | 15 | 100 |
| 12677 chromosome 15: 37388498 -<br>37388533 | 13238165 | IDncRNAdb132<br>38165 | >FR0404424 Putative conserved noncoding region<br>(EvoFold) Hsapiens | fRNAdb_v3.4     | Ab initio<br>prediction | 1.2e-12 | 100 | 32 | 100 |
|                                             | 8212543  | IDncRNAdb821<br>2543  | >gnl evofold EVF39125 111                                            | RNAdb_ALL.fasta | Ab initio<br>prediction | 1.2e-12 | 100 | 32 | 100 |
| 12750 chromosome 6: 37693032 -<br>37693067  | 13224272 | IDncRNAdb132<br>24272 | >FR0359449 Putative conserved noncoding region<br>(RNAz) Hsapiens    | fRNAdb_v3.4     | Ab initio<br>prediction | 1.4e-12 | 100 | 25 | 100 |
|                                             | 8460808  | IDncRNAdb846<br>0808  | >gnl Rnaz RNZ29126 143                                               | RNAdb_ALL.fasta | Ab initio<br>prediction | 1.4e-12 | 100 | 25 | 100 |
| 1283 chromosome X: 109298576 -<br>109298611 | 13169680 | IDncRNAdb131<br>69680 | >FR0183135 Putative conserved noncoding region<br>(EvoFold) Hsapiens | fRNAdb_v3.4     | Ab initio<br>prediction | 9.3e-13 | 100 | 46 | 100 |
|                                             | 8200854  | IDncRNAdb820<br>0854  | >gnl evofold EVF28499 77                                             | RNAdb_ALL.fasta | Ab initio<br>prediction | 9.2e-13 | 100 | 47 | 100 |
| 12947 chromosome 20: 38792900 -<br>38792935 | 13129535 | IDncRNAdb131<br>29535 | >FR0053445 Putative conserved noncoding region<br>(RNAz) Hsapiens    | fRNAdb_v3.4     | Ab initio<br>prediction | 1.6e-12 | 100 | 12 | 100 |
|                                             | 8452357  | IDncRNAdb845<br>2357  | >gnl Rnaz RNZ21443 279                                               | RNAdb_ALL.fasta | Ab initio<br>prediction | 1.6e-12 | 100 | 12 | 100 |
| 13390 chromosome 17: 41215797 -<br>41215832 | 13115650 | IDncRNAdb131<br>15650 | >FR0009045 Putative conserved noncoding region<br>(RNAz) Hsapiens    | fRNAdb_v3.4     | Ab initio<br>prediction | 1.1e-12 | 100 | 38 | 100 |
|                                             | 8445735  | IDncRNAdb844<br>5735  | >gnl Rnaz RNZ15423 93                                                | RNAdb_ALL.fasta | Ab initio<br>prediction | 1.1e-12 | 100 | 39 | 100 |
| 13566 chromosome 2: 42255151 -<br>42255186  | 13119579 | IDncRNAdb131<br>19579 | >FR0021473 Putative conserved noncoding region<br>(RNAz) Hsapiens    | fRNAdb_v3.4     | Ab initio<br>prediction | 1.1e-12 | 100 | 36 | 100 |
|                                             | 8448787  | IDncRNAdb844<br>8787  | >gnl Rnaz RNZ18198 100                                               | RNAdb_ALL.fasta | Ab initio<br>prediction | 1.1e-12 | 100 | 36 | 100 |
| 1402 chromosome X: 110187501 -<br>110187536 | 13200599 | IDncRNAdb132<br>00599 | >FR0283330 Putative conserved noncoding region<br>(RNAz) Hsapiens    | fRNAdb_v3.4     | Ab initio<br>prediction | 1.5e-12 | 100 | 18 | 100 |
|                                             | 8468695  | IDncRNAdb846<br>8695  | >gnl Rnaz RNZ36296 197                                               | RNAdb_ALL.fasta | Ab initio<br>prediction | 1.5e-12 | 100 | 18 | 100 |
| 14322 chromosome 19: 46440705 -<br>46440740 | 13164858 | IDncRNAdb131<br>64858 | >FR0167298 Putative conserved noncoding region<br>(RNAz) Hsapiens    | fRNAdb_v3.4     | Ab initio<br>prediction | 1.7e-12 | 100 | 9  | 100 |
|                                             | 8448049  | IDncRNAdb844<br>8049  | >gnl Rnaz RNZ17527 388                                               | RNAdb_ALL.fasta | Ab initio<br>prediction | 1.7e-12 | 100 | 9  | 100 |
| 14548 chromosome 1: 47697993 -<br>47698028  | 13197966 | IDncRNAdb131<br>97966 | >FR0274749 Putative conserved noncoding region<br>(RNAz) Hsapiens    | fRNAdb_v3.4     | Ab initio<br>prediction | 1.5e-12 | 100 | 19 | 100 |
|                                             | 8451495  | IDncRNAdb845<br>1495  | >gnl Rnaz RNZ2066 186                                                | RNAdb_ALL.fasta | Ab initio<br>prediction | 1.5e-12 | 100 | 19 | 100 |
| 14693 chromosome 18: 4847267 -<br>4847302   | 13225272 | IDncRNAdb132<br>25272 | >FR0362817 Putative conserved noncoding region<br>(RNAz) Hsapiens    | fRNAdb_v3.4     | Ab initio<br>prediction | 1.4e-12 | 100 | 22 | 100 |
|                                             | 8446665  | IDncRNAdb844<br>6665  | >gnl Rnaz RNZ16269 157                                               | RNAdb_ALL.fasta | Ab initio<br>prediction | 1.4e-12 | 100 | 23 | 100 |
| 14743 chromosome X: 48815192 -              | 13214756 | IDncRNAdb132          | >FR0329270 Putative conserved noncoding region                       | fRNAdb_v3.4     | Ab initio               | 1.4e-12 | 100 | 24 | 100 |

|                                          |          |                   |                                                                   |                                 |                      |         |     |     |     |
|------------------------------------------|----------|-------------------|-------------------------------------------------------------------|---------------------------------|----------------------|---------|-----|-----|-----|
| 48815227                                 |          | 14756             | (RNAz) Hsapiens                                                   |                                 | prediction           |         |     |     |     |
|                                          | 8467972  | IDncRNAdb8467972  | >gnl Rnaz RNZ35639 149                                            | RNAdb_ALL.fasta                 | Ab initio prediction | 1.4e-12 | 100 | 24  | 100 |
| 15925 chromosome 17: 56408644 - 56408679 | 13183493 | IDncRNAdb13183493 | >FR0228241 Putative conserved noncoding region (RNAz) Hsapiens    | fRNAdb_v3.4                     | Ab initio prediction | 1.1e-12 | 100 | 36  | 100 |
| 16106 chromosome 14: 57321252 - 57321287 | 13133708 | IDncRNAdb13133708 | >FR0066893 Putative conserved noncoding region (RNAz) Hsapiens    | fRNAdb_v3.4                     | Ab initio prediction | 1.4e-12 | 100 | 22  | 100 |
|                                          | 8441195  | IDncRNAdb8441195  | >gnl Rnaz RNZ11296 159                                            | RNAdb_ALL.fasta                 | Ab initio prediction | 1.4e-12 | 100 | 22  | 100 |
| 16118 chromosome 11: 57408685 - 57408720 | 8205500  | IDncRNAdb8205500  | >gnl evofold EVF32722 85                                          | RNAdb_ALL.fasta                 | Ab initio prediction | 1.0e-12 | 100 | 42  | 100 |
| 16207 chromosome 17: 57918633 - 57918668 | 8217669  | IDncRNAdb8217669  | >gnl evofold EVF43785 72                                          | RNAdb_ALL.fasta                 | Ab initio prediction | 8.6e-13 | 100 | 50  | 100 |
| 1708 chromosome 8: 112453349 - 112453386 | 13221956 | IDncRNAdb13221956 | >FR0352105 Putative conserved noncoding region (RNAz) Hsapiens    | fRNAdb_v3.4                     | Ab initio prediction | 1.4e-12 | 100 | 24  | 100 |
|                                          | 8465166  | IDncRNAdb8465166  | >gnl Rnaz RNZ33088 150                                            | RNAdb_ALL.fasta                 | Ab initio prediction | 1.4e-12 | 100 | 24  | 100 |
| 17625 chromosome 11: 67134690 - 67134725 | 13181509 | IDncRNAdb13181509 | >FR0221692 Putative conserved noncoding region (RNAz) Hsapiens    | fRNAdb_v3.4                     | Ab initio prediction | 1.5e-12 | 100 | 15  | 100 |
|                                          | 8472866  | IDncRNAdb8472866  | >gnl Rnaz RNZ7113 233                                             | RNAdb_ALL.fasta                 | Ab initio prediction | 1.5e-12 | 100 | 15  | 100 |
| 18109 chromosome 7: 70038210 - 70038245  | 13237393 | IDncRNAdb13237393 | >FR0401934 Putative conserved noncoding region (EvoFold) Hsapiens | fRNAdb_v3.4                     | Ab initio prediction | 1.1e-12 | 100 | 36  | 100 |
|                                          | 8193605  | IDncRNAdb8193605  | >gnl evofold EVF21909 98                                          | RNAdb_ALL.fasta                 | Ab initio prediction | 1.1e-12 | 100 | 37  | 100 |
|                                          | 239176   | IDncRNAdb239176   | >CRCNEAC00029107 Human                                            | Condor_ALL_Org_Annotation.fasta | ncRNA transcript     | 1.4e-12 | 100 | 23  | 100 |
| 18122 chromosome 3: 70125795 - 70125831  | 13201103 | IDncRNAdb13201103 | >FR0284996 Putative conserved noncoding region (EvoFold) Hsapiens | fRNAdb_v3.4                     | Ab initio prediction | 1.3e-12 | 100 | 27  | 100 |
|                                          | 8181763  | IDncRNAdb8181763  | >gnl evofold EVF11143 130                                         | RNAdb_ALL.fasta                 | Ab initio prediction | 1.3e-12 | 100 | 27  | 100 |
| 18157 chromosome 15: 70391562 - 70391597 | 8442889  | IDncRNAdb8442889  | >gnl Rnaz RNZ12836 461                                            | RNAdb_ALL.fasta                 | Ab initio prediction | 1.7e-12 | 100 | 7   | 100 |
| 18160 chromosome 17: 704270 - 704306     | 13119157 | IDncRNAdb13119157 | >FR0020206 Putative conserved noncoding region (EvoFold) Hsapiens | fRNAdb_v3.4                     | Ab initio prediction | 2.4e-06 | 69  | 100 | 100 |
|                                          | 8216253  | IDncRNAdb8216253  | >gnl evofold EVF42498 25                                          | RNAdb_ALL.fasta                 | Ab initio prediction | 1.1e-05 | 66  | 100 | 100 |
| 18336 chromosome 3: 71591156 - 71591193  | 13141868 | IDncRNAdb13141868 | >FR0093293 Putative conserved noncoding region (RNAz) Hsapiens    | fRNAdb_v3.4                     | Ab initio prediction | 1.2e-12 | 100 | 32  | 100 |
|                                          | 8454353  | IDncRNAdb8454353  | >gnl Rnaz RNZ23258 110                                            | RNAdb_ALL.fasta                 | Ab initio prediction | 1.2e-12 | 100 | 33  | 100 |
| 18442 chromosome 3: 72221386 - 72221422  | 13134147 | IDncRNAdb13134147 | >FR0068415 Putative conserved noncoding region (RNAz) Hsapiens    | fRNAdb_v3.4                     | Ab initio prediction | 1.4e-12 | 100 | 20  | 100 |

|                                             |          |                       |                                                                      |                 |                         |         |     |    |     |
|---------------------------------------------|----------|-----------------------|----------------------------------------------------------------------|-----------------|-------------------------|---------|-----|----|-----|
|                                             | 8454379  | IDncRNAdb845<br>4379  | >gnl Rnaz RNZ23281 177                                               | RNAdb_ALL.fasta | Ab initio<br>prediction | 1.4e-12 | 100 | 20 | 100 |
| 18526 chromosome 3: 72817283 -<br>72817318  | 13125634 | IDncRNAdb131<br>25634 | >FR0040905 Putative conserved noncoding region<br>(RNAz) Hsapiens    | fRNAdb_v3.4     | Ab initio<br>prediction | 1.6e-12 | 100 | 11 | 100 |
|                                             | 8454392  | IDncRNAdb845<br>4392  | >gnl Rnaz RNZ23293 307                                               | RNAdb_ALL.fasta | Ab initio<br>prediction | 1.6e-12 | 100 | 11 | 100 |
| 18665 chromosome 2: 7350334 -<br>7350369    | 13115547 | IDncRNAdb131<br>15547 | >FR0008727 Putative conserved noncoding region<br>(RNAz) Hsapiens    | fRNAdb_v3.4     | Ab initio<br>prediction | 6.2e-13 | 100 | 63 | 100 |
|                                             | 8444025  | IDncRNAdb844<br>4025  | >gnl Rnaz RNZ13869 57                                                | RNAdb_ALL.fasta | Ab initio<br>prediction | 5.9e-13 | 100 | 64 | 100 |
| 18716 chromosome X: 73834571 -<br>73834606  | 13203106 | IDncRNAdb132<br>03106 | >FR0291402 Putative conserved noncoding region<br>(RNAz) Hsapiens    | fRNAdb_v3.4     | Ab initio<br>prediction | 1.5e-12 | 100 | 16 | 100 |
|                                             | 8468331  | IDncRNAdb846<br>8331  | >gnl Rnaz RNZ35965 224                                               | RNAdb_ALL.fasta | Ab initio<br>prediction | 1.5e-12 | 100 | 16 | 100 |
| 19479 chromosome 15: 78031473 -<br>78031508 | 13121632 | IDncRNAdb131<br>21632 | >FR0027925 Putative conserved noncoding region<br>(RNAz) Hsapiens    | fRNAdb_v3.4     | Ab initio<br>prediction | 1.4e-12 | 100 | 22 | 100 |
|                                             | 8443050  | IDncRNAdb844<br>3050  | >gnl Rnaz RNZ12982 159                                               | RNAdb_ALL.fasta | Ab initio<br>prediction | 1.4e-12 | 100 | 22 | 100 |
| 20187 chromosome 18: 8218318 -<br>8218353   | 13132614 | IDncRNAdb131<br>32614 | >FR0063232 Putative conserved noncoding region<br>(EvoFold) Hsapiens | fRNAdb_v3.4     | Ab initio<br>prediction | 1.4e-12 | 100 | 20 | 100 |
|                                             | 8218302  | IDncRNAdb821<br>8302  | >gnl evofold EVF44360 177                                            | RNAdb_ALL.fasta | Ab initio<br>prediction | 1.4e-12 | 100 | 20 | 100 |
| 20303 chromosome 5: 82968713 -<br>82968748  | 13124042 | IDncRNAdb131<br>24042 | >FR0035748 Putative conserved noncoding region<br>(RNAz) Hsapiens    | fRNAdb_v3.4     | Ab initio<br>prediction | 1.4e-12 | 100 | 22 | 100 |
|                                             | 8458544  | IDncRNAdb845<br>8544  | >gnl Rnaz RNZ27068 163                                               | RNAdb_ALL.fasta | Ab initio<br>prediction | 1.4e-12 | 100 | 22 | 100 |
| 20488 chromosome 7: 8418219 -<br>8418254    | 13126479 | IDncRNAdb131<br>26479 | >FR0043658 Putative conserved noncoding region<br>(RNAz) Hsapiens    | fRNAdb_v3.4     | Ab initio<br>prediction | 1.4e-12 | 100 | 22 | 100 |
|                                             | 8462293  | IDncRNAdb846<br>2293  | >gnl Rnaz RNZ30476 157                                               | RNAdb_ALL.fasta | Ab initio<br>prediction | 1.4e-12 | 100 | 23 | 100 |
| 20805 chromosome 10: 86151459 -<br>86151494 | 13175023 | IDncRNAdb131<br>75023 | >FR0200510 Putative conserved noncoding region<br>(EvoFold) Hsapiens | fRNAdb_v3.4     | Ab initio<br>prediction | 5.8e-07 | 100 | 14 | 94  |
|                                             | 8187521  | IDncRNAdb818<br>7521  | >gnl evofold EVF16378 253                                            | RNAdb_ALL.fasta | Ab initio<br>prediction | 5.8e-07 | 100 | 14 | 94  |
| 210 chromosome 17: 1014140 -<br>1014175     | 13136161 | IDncRNAdb131<br>36161 | >FR0075006 Putative conserved noncoding region<br>(RNAz) Hsapiens    | fRNAdb_v3.4     | Ab initio<br>prediction | 1.3e-12 | 100 | 25 | 100 |
|                                             | 8444875  | IDncRNAdb844<br>4875  | >gnl Rnaz RNZ14641 139                                               | RNAdb_ALL.fasta | Ab initio<br>prediction | 1.3e-12 | 100 | 26 | 100 |
| 2116 chromosome 5: 115962268 -<br>115962303 | 13181240 | IDncRNAdb131<br>81240 | >FR0220825 Putative conserved noncoding region<br>(RNAz) Hsapiens    | fRNAdb_v3.4     | Ab initio<br>prediction | 1.6e-12 | 100 | 14 | 100 |
|                                             | 8458979  | IDncRNAdb845<br>8979  | >gnl Rnaz RNZ27463 243                                               | RNAdb_ALL.fasta | Ab initio<br>prediction | 1.6e-12 | 100 | 14 | 100 |
| 21163 chromosome 1: 88450683 -              | 13142763 | IDncRNAdb131          | >FR0096188 Putative conserved noncoding region                       | fRNAdb_v3.4     | Ab initio               | 1.3e-12 | 100 | 26 | 100 |

|                                           |          |                   |                                                                   |                                 |                      |         |     |     |     |
|-------------------------------------------|----------|-------------------|-------------------------------------------------------------------|---------------------------------|----------------------|---------|-----|-----|-----|
| 88450718                                  |          | 42763             | (RNAz) Hsapiens                                                   |                                 | prediction           |         |     |     |     |
|                                           | 8458447  | IDncRNAdb8458447  | >gnl Rnaz RNZ2698 135                                             | RNAdb_ALL.fasta                 | Ab initio prediction | 1.3e-12 | 100 | 26  | 100 |
| 21184 chromosome 5: 88586421 - 88586456   | 13117425 | IDncRNAdb13117425 | >FR0014671 Putative conserved noncoding region (RNAz) Hsapiens    | fRNAdb_v3.4                     | Ab initio prediction | 1.5e-12 | 100 | 18  | 100 |
|                                           | 8458651  | IDncRNAdb8458651  | >gnl Rnaz RNZ27165 193                                            | RNAdb_ALL.fasta                 | Ab initio prediction | 1.5e-12 | 100 | 18  | 100 |
| 22243 chromosome 15: 96949661 - 96949696  | 13147662 | IDncRNAdb13147662 | >FR0112154 Putative conserved noncoding region (EvoFold) Hsapiens | fRNAdb_v3.4                     | Ab initio prediction | 4.8e-09 | 80  | 100 | 100 |
|                                           | 238781   | IDncRNAdb238781   | >CRCNEAC00027216 Human                                            | Condor_ALL_Org_Annotation.fasta | ncRNA transcript     | 1.4e-12 | 100 | 20  | 100 |
| 22320 chromosome 12: 97503032 - 97503067  | 13112996 | IDncRNAdb13112996 | >FR0000618 Putative conserved noncoding region (RNAz) Hsapiens    | fRNAdb_v3.4                     | Ab initio prediction | 1.4e-12 | 100 | 23  | 100 |
|                                           | 8475182  | IDncRNAdb8475182  | >gnl Rnaz RNZ9429 152                                             | RNAdb_ALL.fasta                 | Ab initio prediction | 1.4e-12 | 100 | 23  | 100 |
| 22595 chromosome 8: 99395031 - 99395066   | 13211075 | IDncRNAdb13211075 | >FR0317244 Putative conserved noncoding region (RNAz) Hsapiens    | fRNAdb_v3.4                     | Ab initio prediction | 1.3e-12 | 100 | 30  | 100 |
|                                           | 8465015  | IDncRNAdb8465015  | >gnl Rnaz RNZ32950 119                                            | RNAdb_ALL.fasta                 | Ab initio prediction | 1.3e-12 | 100 | 30  | 100 |
| 2436 chromosome X: 118827625 - 118827660  | 13178503 | IDncRNAdb13178503 | >FR0211790  Hsapiens                                              | fRNAdb_v3.4                     | Ab initio prediction | 1.8e-12 | 100 | 1   | 100 |
| 2640 chromosome 1: 120396276 - 120396311  | 13160515 | IDncRNAdb13160515 | >FR0153307 Putative conserved noncoding region (RNAz) Hsapiens    | fRNAdb_v3.4                     | Ab initio prediction | 1.2e-12 | 100 | 31  | 100 |
|                                           | 8463892  | IDncRNAdb8463892  | >gnl Rnaz RNZ3193 116                                             | RNAdb_ALL.fasta                 | Ab initio prediction | 1.2e-12 | 100 | 31  | 100 |
| 2796 chromosome 4: 121771413 - 121771448  | 13150244 | IDncRNAdb13150244 | >FR0120439 Putative conserved noncoding region (RNAz) Hsapiens    | fRNAdb_v3.4                     | Ab initio prediction | 1.3e-12 | 100 | 26  | 100 |
|                                           | 8455805  | IDncRNAdb8455805  | >gnl Rnaz RNZ24578 134                                            | RNAdb_ALL.fasta                 | Ab initio prediction | 1.3e-12 | 100 | 27  | 100 |
| 2877 chromosome 5: 122435527 - 122435562  | 13128653 | IDncRNAdb13128653 | >FR0050701 Putative conserved noncoding region (EvoFold) Hsapiens | fRNAdb_v3.4                     | Ab initio prediction | 7.7e-13 | 100 | 55  | 100 |
|                                           | 8187331  | IDncRNAdb8187331  | >gnl evofold EVF16205 65                                          | RNAdb_ALL.fasta                 | Ab initio prediction | 7.5e-13 | 100 | 56  | 100 |
| 309 chromosome 10: 102194923 - 102194958  | 13191362 | IDncRNAdb13191362 | >FR0253700  Hsapiens                                              | fRNAdb_v3.4                     | ncRNA                | 8.9e-10 | 100 | 1   | 97  |
| 3313 chromosome 11: 126148420 - 126148455 | 13170877 | IDncRNAdb13170877 | >FR0187049 Putative conserved noncoding region (RNAz) Hsapiens    | fRNAdb_v3.4                     | Ab initio prediction | 1.4e-12 | 100 | 22  | 100 |
|                                           | 8473740  | IDncRNAdb8473740  | >gnl Rnaz RNZ7987 158                                             | RNAdb_ALL.fasta                 | Ab initio prediction | 1.4e-12 | 100 | 22  | 100 |
| 3737 chromosome 11: 130097531 - 130097566 | 13151363 | IDncRNAdb13151363 | >FR0124026 Putative conserved noncoding region (RNAz) Hsapiens    | fRNAdb_v3.4                     | Ab initio prediction | 1.2e-12 | 100 | 31  | 100 |
|                                           | 8473844  | IDncRNAdb8473844  | >gnl Rnaz RNZ8091 114                                             | RNAdb_ALL.fasta                 | Ab initio prediction | 1.2e-12 | 100 | 31  | 100 |

|                                          |          |                       |                                                                   |                                 |                      |         |     |    |     |
|------------------------------------------|----------|-----------------------|-------------------------------------------------------------------|---------------------------------|----------------------|---------|-----|----|-----|
| 3802 chromosome 7: 130561507 - 130561543 | 13132269 | IDncRNAdb131<br>32269 | >FR0062169 Putative conserved noncoding region (EvoFold) Hsapiens | fRNAdb_v3.4                     | Ab initio prediction | 7.1e-13 | 100 | 58 | 100 |
|                                          | 8193963  | IDncRNAdb819<br>3963  | >gnl evofold EVF22234_62                                          | RNAdb_ALL.fasta                 | Ab initio prediction | 7.0e-13 | 100 | 59 | 100 |
| 4316 chromosome 7: 134955336 - 134955371 | 13128874 | IDncRNAdb131<br>28874 | >FR0051410 Putative conserved noncoding region (RNAz) Hsapiens    | fRNAdb_v3.4                     | Ab initio prediction | 1.5e-12 | 100 | 18 | 100 |
|                                          | 8463840  | IDncRNAdb846<br>3840  | >gnl Rnaz RNZ31882_196                                            | RNAdb_ALL.fasta                 | Ab initio prediction | 1.5e-12 | 100 | 18 | 100 |
| 4815 chromosome 9: 140066431 - 140066466 | 13138958 | IDncRNAdb131<br>38958 | >FR0084042 Putative conserved noncoding region (RNAz) Hsapiens    | fRNAdb_v3.4                     | Ab initio prediction | 1.4e-12 | 100 | 23 | 100 |
|                                          | 8467285  | IDncRNAdb846<br>7285  | >gnl Rnaz RNZ35014_152                                            | RNAdb_ALL.fasta                 | Ab initio prediction | 1.4e-12 | 100 | 23 | 100 |
| 5186 chromosome 3: 14494716 - 14494751   | 13207339 | IDncRNAdb132<br>07339 | >FR0305089 Putative conserved noncoding region (RNAz) Hsapiens    | fRNAdb_v3.4                     | Ab initio prediction | 1.5e-12 | 100 | 18 | 100 |
|                                          | 8453510  | IDncRNAdb845<br>3510  | >gnl Rnaz RNZ22491_192                                            | RNAdb_ALL.fasta                 | Ab initio prediction | 1.5e-12 | 100 | 18 | 100 |
| 5437 chromosome 4: 147574412 - 147574448 | 13237921 | IDncRNAdb132<br>37921 | >FR0403645 Putative conserved noncoding region (EvoFold) Hsapiens | fRNAdb_v3.4                     | Ab initio prediction | 1.5e-12 | 100 | 18 | 100 |
|                                          | 8185946  | IDncRNAdb818<br>5946  | >gnl evofold EVF14946_195                                         | RNAdb_ALL.fasta                 | Ab initio prediction | 1.5e-12 | 100 | 18 | 100 |
|                                          | 234161   | IDncRNAdb234<br>161   | >CRCNEAC00004778_Human                                            | Condor_ALL_Org_Annotation.fasta | ncRNA                | 1.5e-12 | 100 | 15 | 100 |
| 5778 chromosome 17: 15166633 - 15166668  | 13128334 | IDncRNAdb131<br>28334 | >FR0049715 Putative conserved noncoding region (RNAz) Hsapiens    | fRNAdb_v3.4                     | Ab initio prediction | 1.2e-12 | 100 | 32 | 100 |
|                                          | 8445161  | IDncRNAdb844<br>5161  | >gnl Rnaz RNZ14901_111                                            | RNAdb_ALL.fasta                 | Ab initio prediction | 1.2e-12 | 100 | 32 | 100 |
| 5780 chromosome 4: 151678609 - 151678644 | 13122716 | IDncRNAdb131<br>22716 | >FR0031470 Putative conserved noncoding region (RNAz) Hsapiens    | fRNAdb_v3.4                     | Ab initio prediction | 1.5e-12 | 100 | 19 | 100 |
|                                          | 8457478  | IDncRNAdb845<br>7478  | >gnl Rnaz RNZ26099_184                                            | RNAdb_ALL.fasta                 | Ab initio prediction | 1.5e-12 | 100 | 19 | 100 |
| 654 chromosome 20: 10447092 - 10447127   | 13156249 | IDncRNAdb131<br>56249 | >FR0139412 Putative conserved noncoding region (RNAz) Hsapiens    | fRNAdb_v3.4                     | Ab initio prediction | 1.5e-12 | 100 | 15 | 100 |
|                                          | 8451918  | IDncRNAdb845<br>1918  | >gnl Rnaz RNZ21044_236                                            | RNAdb_ALL.fasta                 | Ab initio prediction | 1.5e-12 | 100 | 15 | 100 |
| 6540 chromosome 9: 16262515 - 16262550   | 13232298 | IDncRNAdb132<br>32298 | >FR0385391 Putative conserved noncoding region (RNAz) Hsapiens    | fRNAdb_v3.4                     | Ab initio prediction | 1.4e-12 | 100 | 22 | 100 |
|                                          | 8465790  | IDncRNAdb846<br>5790  | >gnl Rnaz RNZ33655_160                                            | RNAdb_ALL.fasta                 | Ab initio prediction | 1.4e-12 | 100 | 22 | 100 |
| 672 chromosome 14: 104583768 - 104583803 | 13176984 | IDncRNAdb131<br>76984 | >FR0206860 Putative conserved noncoding region (EvoFold) Hsapiens | fRNAdb_v3.4                     | Ab initio prediction | 1.0e-12 | 100 | 42 | 100 |
|                                          | 8212128  | IDncRNAdb821<br>2128  | >gnl evofold EVF38748_84                                          | RNAdb_ALL.fasta                 | Ab initio prediction | 1.0e-12 | 100 | 43 | 100 |
| 6962 chromosome 3: 169382202 -           | 13228695 | IDncRNAdb132          | >FR0373841 Putative conserved noncoding region                    | fRNAdb_v3.4                     | Ab initio            | 1.3e-12 | 100 | 30 | 100 |

|                                          |          |                   |                                                                   |                 |                      |         |     |    |     |
|------------------------------------------|----------|-------------------|-------------------------------------------------------------------|-----------------|----------------------|---------|-----|----|-----|
| 169382237                                |          | 28695             | (RNAz) Hsapiens                                                   |                 | prediction           |         |     |    |     |
|                                          | 8455591  | IDncRNAdb8455591  | >gnl Rnaz RNZ24383 120                                            | RNAdb_ALL.fasta | Ab initio prediction | 1.3e-12 | 100 | 30 | 100 |
| 7169 chromosome 9: 17323262 - 17323297   | 13114567 | IDncRNAdb13114567 | >FR0005602 Putative conserved noncoding region (EvoFold) Hsapiens | fRNAdb_v3.4     | Ab initio prediction | 1.5e-12 | 100 | 16 | 100 |
|                                          | 13154110 | IDncRNAdb13154110 | >FR0132588 Putative conserved noncoding region (RNAz) Hsapiens    | fRNAdb_v3.4     | Ab initio prediction | 1.4e-12 | 100 | 20 | 100 |
|                                          | 8197844  | IDncRNAdb8197844  | >gnl evofold EVF25762 212                                         | RNAdb_ALL.fasta | Ab initio prediction | 1.5e-12 | 100 | 17 | 100 |
|                                          | 8465855  | IDncRNAdb8465855  | >gnl Rnaz RNZ33714 172                                            | RNAdb_ALL.fasta | Ab initio prediction | 1.4e-12 | 100 | 21 | 100 |
|                                          | 13171507 | IDncRNAdb13171507 | >FR0189183 Putative conserved noncoding region (RNAz) Hsapiens    | fRNAdb_v3.4     | Ab initio prediction | 1.6e-12 | 100 | 12 | 100 |
| 7337 chromosome 5: 176307457 - 176307492 | 8460256  | IDncRNAdb8460256  | >gnl Rnaz RNZ28624 300                                            | RNAdb_ALL.fasta | Ab initio prediction | 1.6e-12 | 100 | 12 | 100 |
|                                          | 13141969 | IDncRNAdb13141969 | >FR0093641 Putative conserved noncoding region (RNAz) Hsapiens    | fRNAdb_v3.4     | Ab initio prediction | 1.5e-12 | 100 | 18 | 100 |
| 7352 chromosome 5: 176561551 - 176561586 | 8460260  | IDncRNAdb8460260  | >gnl Rnaz RNZ28628 194                                            | RNAdb_ALL.fasta | Ab initio prediction | 1.5e-12 | 100 | 18 | 100 |
|                                          | 13190798 | IDncRNAdb13190798 | >FR0251870 Putative conserved noncoding region (EvoFold) Hsapiens | fRNAdb_v3.4     | Ab initio prediction | 1.4e-12 | 100 | 23 | 100 |
| 7494 chromosome 3: 17878622 - 17878657   | 8180821  | IDncRNAdb8180821  | >gnl evofold EVF10287 156                                         | RNAdb_ALL.fasta | Ab initio prediction | 1.4e-12 | 100 | 23 | 100 |
|                                          | 13206705 | IDncRNAdb13206705 | >FR0302991 Putative conserved noncoding region (EvoFold) Hsapiens | fRNAdb_v3.4     | Ab initio prediction | 9.6e-13 | 100 | 45 | 100 |
| 79 chromosome 14: 100576031 - 100576066  | 8212030  | IDncRNAdb8212030  | >gnl evofold EVF38659 79                                          | RNAdb_ALL.fasta | Ab initio prediction | 9.5e-13 | 100 | 46 | 100 |
|                                          | 13141670 | IDncRNAdb13141670 | >FR0092699 Putative conserved noncoding region (RNAz) Hsapiens    | fRNAdb_v3.4     | Ab initio prediction | 1.2e-12 | 100 | 34 | 100 |
| 7956 chromosome 3: 186504488 - 186504529 | 8455947  | IDncRNAdb8455947  | >gnl Rnaz RNZ24707 105                                            | RNAdb_ALL.fasta | Ab initio prediction | 1.2e-12 | 100 | 34 | 100 |
|                                          | 13175402 | IDncRNAdb13175402 | >FR0201765 Putative conserved noncoding region (RNAz) Hsapiens    | fRNAdb_v3.4     | Ab initio prediction | 1.3e-12 | 100 | 30 | 100 |
| 8070 chromosome 18: 18880113 - 18880148  | 8446708  | IDncRNAdb8446708  | >gnl Rnaz RNZ16308 120                                            | RNAdb_ALL.fasta | Ab initio prediction | 1.3e-12 | 100 | 30 | 100 |
|                                          | 13220740 | IDncRNAdb13220740 | >FR0348120 Putative conserved noncoding region (RNAz) Hsapiens    | fRNAdb_v3.4     | Ab initio prediction | 1.3e-12 | 100 | 25 | 100 |
| 8252 chromosome 1: 19253769 - 19253804   | 8442838  | IDncRNAdb8442838  | >gnl Rnaz RNZ1279 141                                             | RNAdb_ALL.fasta | Ab initio prediction | 1.3e-12 | 100 | 25 | 100 |
|                                          | 13137204 | IDncRNAdb13137204 | >FR0078348 Putative conserved noncoding region (EvoFold) Hsapiens | fRNAdb_v3.4     | Ab initio prediction | 6.4e-13 | 100 | 62 | 100 |
| 8519 chromosome 1: 198828219 - 198828254 | 8218499  | IDncRNAdb8218499  | >gnl evofold EVF4454 58                                           | RNAdb_ALL.fasta | Ab initio prediction | 6.2e-13 | 100 | 63 | 100 |

|                                          |          |                   |                                                                   |                 |                      |         |     |    |     |
|------------------------------------------|----------|-------------------|-------------------------------------------------------------------|-----------------|----------------------|---------|-----|----|-----|
| 8975 chromosome 2: 21130849 - 21130884   | 13187661 | IDncRNAdb13187661 | >FR0241697 Putative conserved noncoding region (RNAz) Hsapiens    | fRNAdb_v3.4     | Ab initio prediction | 1.6e-12 | 100 | 10 | 100 |
|                                          | 8448461  | IDncRNAdb8448461  | >gnl Rnaz RNZ17901 338                                            | RNAdb_ALL.fasta | Ab initio prediction | 1.6e-12 | 100 | 10 | 100 |
| 9063 chromosome 1: 213898547 - 213898582 | 13162901 | IDncRNAdb13162901 | >FR0160866 Putative conserved noncoding region (RNAz) Hsapiens    | fRNAdb_v3.4     | Ab initio prediction | 1.3e-12 | 100 | 30 | 100 |
|                                          | 8470016  | IDncRNAdb8470016  | >gnl Rnaz RNZ4263 120                                             | RNAdb_ALL.fasta | Ab initio prediction | 1.3e-12 | 100 | 30 | 100 |
| 9281 chromosome 22: 22007279 - 22007314  | 13155521 | IDncRNAdb13155521 | >FR0137102 Putative conserved noncoding region (EvoFold) Hsapiens | fRNAdb_v3.4     | Ab initio prediction | 6.8e-13 | 100 | 60 | 100 |
|                                          | 8222384  | IDncRNAdb8222384  | >gnl evofold EVF48071 60                                          | RNAdb_ALL.fasta | Ab initio prediction | 6.6e-13 | 100 | 61 | 100 |
| 9432 chromosome 1: 22441121 - 22441156   | 13201144 | IDncRNAdb13201144 | >FR0285131 Putative conserved noncoding region (RNAz) Hsapiens    | fRNAdb_v3.4     | Ab initio prediction | 1.5e-12 | 100 | 17 | 100 |
|                                          | 8443399  | IDncRNAdb8443399  | >gnl Rnaz RNZ1330 206                                             | RNAdb_ALL.fasta | Ab initio prediction | 1.5e-12 | 100 | 17 | 100 |
| 956 chromosome 10: 106504668 - 106504703 | 13147857 | IDncRNAdb13147857 | >FR0112745 Putative conserved noncoding region (RNAz) Hsapiens    | fRNAdb_v3.4     | Ab initio prediction | 1.3e-12 | 100 | 30 | 100 |
|                                          | 8471574  | IDncRNAdb8471574  | >gnl Rnaz RNZ5821 120                                             | RNAdb_ALL.fasta | Ab initio prediction | 1.3e-12 | 100 | 30 | 100 |
